# Supplementary material for: Cobalt-catalyzed reductive Mannich reactions of 4-acryloylmorpholine with N-tosyl aldimines
Source: Royal Society of Chemistry journal article supplement (doi:10.1039/b715839d), 2007-11-19

# Cobalt-catalyzed reductive Mannich reactions of 4-acryloylmorpholine with *N*-tosyl aldimines

Oscar Prieto and Hon Wai Lam\*

*School of Chemistry, University of Edinburgh, Joseph Black Building, The King's Buildings, West Mains Road, Edinburgh, EH9 3JJ, United Kingdom*

## Supplementary Information

| Contents                                     | Page |
|----------------------------------------------|------|
| General Information                          | 1    |
| Preparation of Imines                        | 2    |
| Cobalt-Catalyzed Reductive Mannich Reactions | 3    |
| Stereochemical Determinations                | 12   |
| NMR Spectra of New Compounds                 | 13   |

### General Information

All reactions were carried out under a nitrogen atmosphere in oven-dried apparatus. CH<sub>2</sub>Cl<sub>2</sub> and THF were dried and purified by passage through activated alumina columns using a solvent purification system from [www.glasscontour.com](http://www.glasscontour.com) 'Petrol' refers to that fraction of light petroleum ether boiling in the range 40-60 °C. All other commercially available reagents were used as received. Thin layer chromatography (TLC) was performed on Merck DF-Alufoilien 60F<sub>254</sub> 0.2 mm precoated plates. Product spots were visualized by UV light at 254 nm, and subsequently developed using potassium permanganate or ceric ammonium molybdate solution as appropriate. Flash column chromatography was carried out using silica gel (Fisher Scientific 60Å particle size 35-70 micron) employing the method of Still and co-workers.<sup>1</sup> Melting points were recorded on a Gallenkamp melting point apparatus and are uncorrected. Infra-red spectra were recorded on a Jasco FT/IR-460 Plus instrument as a thin film on sodium chloride plates or as a dilute solution in CHCl<sub>3</sub>. <sup>1</sup>H NMR spectra were recorded on a Bruker DPX360 (360 MHz) spectrometer or a Bruker ARX250 (250 MHz) spectrometer. Chemical shifts (δ) are quoted in parts per million (ppm) downfield of tetramethylsilane, using residual

---

1. Still, W. C.; Kahn, M.; Mitra, A. *J. Org. Chem.* **1978**, *43*, 2923–2925.

protonated solvent as internal standard ( $\text{CDCl}_3$  at 7.27 ppm). Abbreviations used in the description of resonances are: s (singlet), d (doublet), t (triplet), q, (quartet), app (apparent), br (broad). Coupling constants ( $J$ ) are quoted to the nearest 0.1 Hz. Proton-decoupled  $^{13}\text{C}$  NMR spectra were recorded on a Bruker DPX360 (90.6 MHz) spectrometer or a Bruker ARX250 (62.9 MHz) spectrometer. Chemical shifts ( $\delta$ ) are quoted in parts per million (ppm) downfield of tetramethylsilane, using deuterated solvent as internal standard ( $\text{CDCl}_3$  at 77.0 ppm). Assignments were made using the DEPT sequence with secondary pulses at  $90^\circ$  and  $135^\circ$ . High resolution mass spectra were recorded on a Finnigan MAT 900 XLT spectrometer using the electrospray (ES) positive ion mode at the EPSRC National Mass Spectrometry Service Centre, University of Wales Swansea, or on a Kratos MS50TC spectrometer using the fast atom bombardment (FAB) technique in the mass spectrometry laboratory at the School of Chemistry, University of Edinburgh. Stated calculated mass values refer to that of the *ion* (i.e. the actual species being detected), *not* that of the neutral parent compound.

## Preparation of Imines

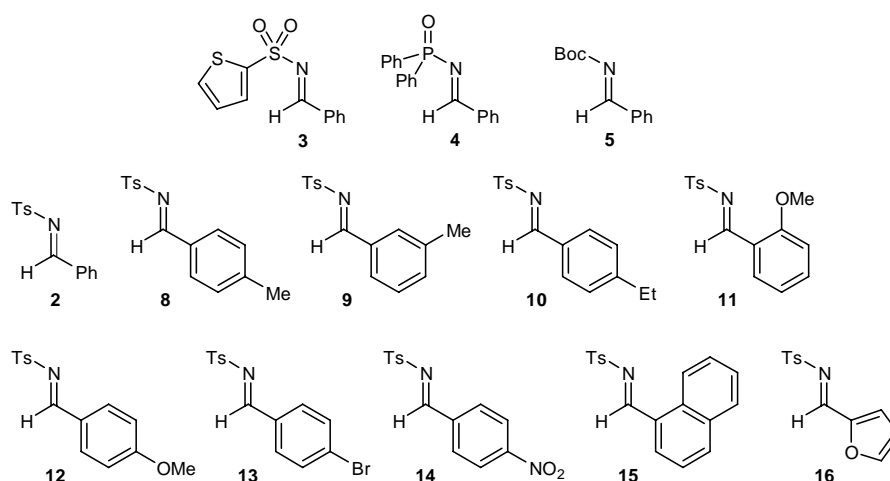

The known thienylsulfonyl imine **3**,<sup>2</sup> diphenylphosphinoyl imine **4**,<sup>3</sup> and *tert*-butoxycarbonylimine **5**<sup>4</sup> were prepared according to literature procedures.<sup>2-4</sup> The known *N*-tosylimines **2**,<sup>5</sup> **8**,<sup>5</sup> **9**,<sup>5</sup> **10**,<sup>6</sup> **11**,<sup>7</sup> **12**,<sup>7</sup> **13**,<sup>8</sup> **14**,<sup>9</sup> **15**<sup>7</sup> and **16**<sup>7</sup> were prepared according to literature procedures.<sup>9</sup>

- González, A. S.; Arrayás, R. G.; Carretero, J. C. *Org. Lett.* **2006**, *8*, 2977–2980.
- Boyd, D. R.; Malone, J. F.; McGuckin, M. R.; Jennings, W. B.; Rutherford, M.; Saket, B. M. *J. Chem. Soc., Perkin Trans. 2* **1998**, 1145–1150.
- Wenzel, A. G.; Jacobsen, E. N. *J. Am. Chem. Soc.* **2002**, *124*, 12964–12965.
- Nishimura, T.; Yasuhara, Y.; Hayashi, T. *Org. Lett.* **2006**, *8*, 979–981.
- Xu, Y.-M.; Shi, M. *J. Org. Chem.* **2004**, *69*, 417–425.
- Tokunaga, N.; Otomaru, Y.; Okamoto, K.; Ueyama, K.; Shintani, R.; Hayashi, T. *J. Am. Chem. Soc.* **2004**, *126*, 13584–13585.
- Buskens, P.; Klankermayer, J.; Leitner, W. *J. Am. Chem. Soc.* **2005**, *127*, 16762–16763.
- Sivakumar, A. V.; Babu, G. S.; Bhat, S. V. *Tetrahedron: Asymmetry* **2001**, *12*, 1095–1099.

## Cobalt-Catalyzed Reductive Mannich Reactions: General Procedure

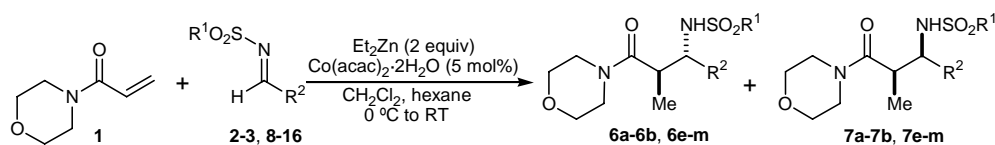

A solution of 4-acryloylmorpholine (**1**) (140  $\mu$ L, 1.10 mmol), the appropriate imine (1.00 mmol) and Co(acac)<sub>2</sub>·2H<sub>2</sub>O (12.9 mg, 0.05 mmol) in CH<sub>2</sub>Cl<sub>2</sub> (20 mL) was stirred at room temperature for 10 min. The mixture was cooled to 0 °C and Et<sub>2</sub>Zn (1 M solution in hexane, 2.00 mL, 2.00 mmol) was then added dropwise over 1 min. The reaction was stirred at 0 °C for 15 min and then at room temperature for 5 h. The reaction was quenched carefully with saturated aqueous NH<sub>4</sub>Cl solution (30 mL) and the mixture was then extracted with CH<sub>2</sub>Cl<sub>2</sub> (3 x 30 mL). The combined organic layers were dried (MgSO<sub>4</sub>) and concentrated *in vacuo*. Purification of the residue by column chromatography afforded the Mannich product.

(±)-*N*-[(1*S*,2*R*)-2-Methyl-3-morpholin-4-yl-3-oxo-1-phenylpropyl]-4-methylbenzenesulfonamide (**6a**) and (±)-*N*-[(1*R*,2*R*)-2-methyl-3-morpholin-4-yl-3-oxo-1-phenylpropyl]-4-methylbenzenesulfonamide (**7a**)

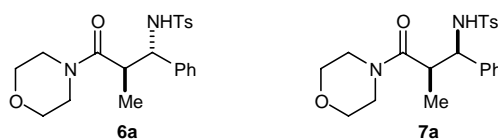

The General Procedure was followed using imine **2** (259 mg, 1.00 mmol) and the reaction mixture was purified by column chromatography (20% EtOAc/CH<sub>2</sub>Cl<sub>2</sub>) to give *anti*-Mannich product **6a** (290 mg, 72%) as a white solid followed by *syn*-Mannich product **7a** (44 mg, 11%) as a white solid.

Data for **6a**: m.p. 134-136 °C; IR (CHCl<sub>3</sub>) 3153 (NH), 2922, 2359, 2341, 1615 (C=O), 1456, 1159, 668 cm<sup>-1</sup>; <sup>1</sup>H NMR (360 MHz, CDCl<sub>3</sub>)  $\delta$  7.53 (2H, d, *J* = 8.3 Hz, ArH), 7.15-7.14 (3H, m, ArH and NH), 7.10-7.04 (5H, m, ArH), 4.59 (1H, dd, *J* = 8.3, 3.8 Hz, CHNH), 3.64-3.49 (2H, m, OCH<sub>2</sub>CH<sub>2</sub>N) 3.35-3.23 (3H, m, OCH<sub>2</sub>CH<sub>2</sub>N), 3.13-3.01 (2H, m, OCH<sub>2</sub>CH<sub>2</sub>N), 2.85-2.79 (1H, m, OCH<sub>2</sub>CH<sub>2</sub>N), 2.68-2.62 (1H, m, CH<sub>3</sub>CH), 2.32 (3H, s, ArCH<sub>3</sub>), 1.23 (3H, d, *J* = 6.9 Hz, CH<sub>3</sub>CH); <sup>13</sup>C NMR (62.9 MHz, CDCl<sub>3</sub>)  $\delta$  172.9 (C), 142.5 (C), 140.1 (C), 138.4 (C), 129.0 (2 x CH), 128.3 (2 x CH), 127.3 (CH), 126.7 (2 x CH), 126.2 (2 x CH), 66.4 (CH<sub>2</sub>), 66.0 (CH<sub>2</sub>), 60.3 (CH), 46.1 (CH<sub>2</sub>), 41.8 (CH<sub>2</sub>), 39.8 (CH), 21.3 (CH<sub>3</sub>), 16.4 (CH<sub>3</sub>); HRMS (ES) Exact mass calcd for C<sub>21</sub>H<sub>27</sub>N<sub>2</sub>O<sub>4</sub>S [M+H]<sup>+</sup>: 403.1687, found: 403.1680.

Data for **7a**: m.p. 118-120 °C; IR (CHCl<sub>3</sub>) 3209 (NH), 2920, 2360, 1616, (C=O), 1457, 1159, 1024 cm<sup>-1</sup>; <sup>1</sup>H NMR (360 MHz, CDCl<sub>3</sub>) δ 7.55 (2H, d, *J* = 8.4 Hz, ArH), 7.18-7.11 (5H, m, ArH), 7.07-7.04 (2H, m, ArH), 5.54 (1H, d, *J* = 7.0 Hz, NH), 4.40 (1H, app t, *J* = 7.4 Hz, CHNH), 3.55-3.39 (3H, m, OCH<sub>2</sub>CH<sub>2</sub>N), 3.34-3.13 (4H, m, OCH<sub>2</sub>CH<sub>2</sub>N), 3.10-3.03 (1H, m, CH<sub>3</sub>CH), 3.01-2.95 (1H, m, OCH<sub>2</sub>CH<sub>2</sub>N), 2.36 (3H, s, ArCH<sub>3</sub>), 1.19 (3H, d, *J* = 6.8 Hz, CH<sub>3</sub>CH); <sup>13</sup>C NMR (62.9 MHz, CDCl<sub>3</sub>) δ 172.1 (C), 143.1 (C), 139.4 (C), 136.9 (C), 129.2 (2 x CH), 128.2 (2 x CH), 127.5 (CH), 127.3 (2 x CH), 127.0 (2 x CH), 66.5 (CH<sub>2</sub>), 66.3 (CH<sub>2</sub>), 60.4 (CH), 46.0 (CH<sub>2</sub>), 41.9 (CH<sub>2</sub>), 41.5 (CH), 21.4 (CH<sub>3</sub>), 14.6 (CH<sub>3</sub>); HRMS (FAB) Exact mass calcd for C<sub>21</sub>H<sub>27</sub>N<sub>2</sub>O<sub>4</sub>S [M+H]<sup>+</sup>: 403.1687, found: 403.1677.

(±)-*N*-[(1*S*,2*R*)-2-Methyl-3-morpholin-4-yl-3-oxo-1-phenylpropyl]-2-thienylsulfonamide (**6b**) and (±)-*N*-[(1*R*,2*R*)-2-methyl-3-morpholin-4-yl-3-oxo-1-phenylpropyl]-2-thienylsulfonamide (**7b**)

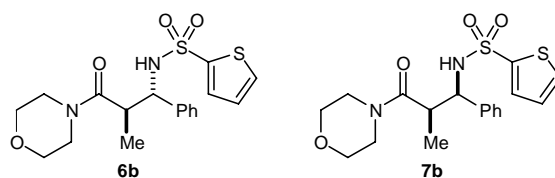

The General Procedure was followed using imine **3** (251 mg, 1.00 mmol) and the reaction mixture was purified by column chromatography (80% EtOAc/Hexane) to give *anti*-Mannich product **6b** (204 mg, 52% yield) as a white solid, followed by *syn*-Mannich product **7b** (39 mg, 10%) as a white solid.

Data for **6b**: m.p. 121-123 °C; IR (CHCl<sub>3</sub>) 3276 (NH), 2968, 2923, 2857, 1618 (C=O), 1453, 1404, 1157, 729 cm<sup>-1</sup>; <sup>1</sup>H NMR (360 MHz, CDCl<sub>3</sub>) δ 7.37-7.34 (2H, m, ArH), 7.31-7.30 (1H, m, ArH), 7.22-7.16 (3H, m, ArH), 7.12-7.09 (2H, m, ArH), 6.83 (1H, dd, *J* = 5.0, 3.8 Hz, NH), 4.64 (1H, dd, *J* = 8.3, 3.8 Hz, CHNH), 3.68-3.49 (2H, m, OCH<sub>2</sub>CH<sub>2</sub>N), 3.36-3.23 (3H, m, OCH<sub>2</sub>CH<sub>2</sub>N), 3.15-3.07 (2H, m, OCH<sub>2</sub>CH<sub>2</sub>N), 2.86-2.80 (1H, m, OCH<sub>2</sub>CH<sub>2</sub>N), 2.68-2.62 (1H, m, CH<sub>3</sub>CH), 1.26 (3H, d, *J* = 6.9 Hz, CH<sub>3</sub>CH); <sup>13</sup>C NMR (62.9 MHz, CDCl<sub>3</sub>) δ 172.9 (C), 142.4 (C), 139.8 (C), 131.5 (CH), 131.0 (CH), 128.4 (2 x CH), 127.5 (CH), 126.8 (CH), 126.0 (2 x CH), 66.4 (CH<sub>2</sub>), 65.9 (CH<sub>2</sub>), 60.5 (CH), 46.1 (CH<sub>2</sub>), 41.9 (CH<sub>2</sub>), 39.7 (CH), 16.2 (CH<sub>3</sub>); HRMS (FAB) Exact mass calcd for C<sub>18</sub>H<sub>23</sub>N<sub>2</sub>O<sub>4</sub>S<sub>2</sub> [M+H]<sup>+</sup>: 395.1094, found: 395.1102.

Data for **7b**: m.p. 132-134 °C; IR (CHCl<sub>3</sub>) 3276 (NH), 2968, 2919, 2857, 1618 (C=O), 1453, 1331, 1157, 729 cm<sup>-1</sup>; <sup>1</sup>H NMR (360 MHz, CDCl<sub>3</sub>) δ 7.44 (1H, dd, *J* = 5.0, 1.4 Hz, ArH), 7.38 (1H, dd, *J* = 3.8, 1.4 Hz, ArH), 7.21-7.17 (3H, m, ArH), 7.13-7.10 (2H, m, ArH), 6.90 (1H, dd, *J* = 5.0, 3.8 Hz, ArH), 5.85 (1H, d, *J* = 7.6 Hz, NH), 4.54 (1H, t, *J* = 8.0 Hz, CHNH), 3.55-3.43 (3H, m, OCH<sub>2</sub>CH<sub>2</sub>N), 3.35-3.14 (4H, m, OCH<sub>2</sub>CH<sub>2</sub>N), 3.09-3.01 (2H, m, OCH<sub>2</sub>CH<sub>2</sub>N and CH<sub>3</sub>CH), 1.24 (3H, d, *J* = 6.8 Hz,

$\text{CH}_3\text{CH}$ );  $^{13}\text{C}$  NMR (62.9 MHz,  $\text{CDCl}_3$ )  $\delta$  172.0 (C), 140.9 (C), 139.1 (C), 132.6 (CH), 131.9 (CH), 128.3 (2 x CH), 127.7 (CH), 127.1 (CH), 126.9 (2 x CH), 66.6 ( $\text{CH}_2$ ), 66.3 ( $\text{CH}_2$ ), 60.7 (CH), 46.1 ( $\text{CH}_2$ ), 42.0 ( $\text{CH}_2$ ), 41.5 (CH), 14.6 ( $\text{CH}_3$ ); HRMS (FAB) Exact mass calcd for  $\text{C}_{18}\text{H}_{23}\text{N}_2\text{O}_4\text{S}_2$   $[\text{M}+\text{H}]^+$ : 395.1094, found: 395.1104.

**(±)-N-[(1S,2R)-2-Methyl-1-(3-methylphenyl)-3-morpholin-4-yl-3-oxopropyl]-4-methylbenzenesulfonamide (6e) and (±)-N-[(1R,2R)-2-methyl-1-(3-methylphenyl)-3-morpholin-4-yl-3-oxopropyl]-4-methylbenzenesulfonamide (7e)**

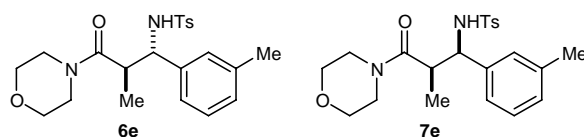

The General Procedure was followed using imine **8** (273 mg, 1.00 mmol) and the reaction mixture was purified by column chromatography (20% EtOAc/ $\text{CH}_2\text{Cl}_2$ ) to give *anti*-Mannich product **6e** (270 mg, 65% yield) as a pale yellow solid followed by the *syn*-Mannich product **7e** (39 mg, 9%) as a white solid.

Data for **6e**: m.p. 75-77 °C; IR ( $\text{CHCl}_3$ ) 3275 (NH), 2966, 2922, 2858, 1618 (C=O), 1334, 1158, 914  $\text{cm}^{-1}$ ;  $^1\text{H}$  NMR (360 MHz,  $\text{CDCl}_3$ )  $\delta$  7.51 (2H, dm,  $J = 8.3$  Hz, ArH), 7.07-7.01 (4H, m, ArH and NH), 6.93 (1H, app d,  $J = 7.5$  Hz, ArH), 6.85 (1H, app d,  $J = 7.6$  Hz, ArH), 6.74 (1H, br s, ArH), 4.55 (1H, dd,  $J = 8.3, 3.9$  Hz, CHNH), 3.67-3.49 (2H, m,  $\text{OCH}_2\text{CH}_2\text{N}$ ), 3.34-3.29 (1H, m,  $\text{OCH}_2\text{CH}_2\text{N}$ ), 3.27-3.19 (2H, m,  $\text{OCH}_2\text{CH}_2\text{N}$ ), 3.12-3.06 (2H, m,  $\text{OCH}_2\text{CH}_2\text{N}$ ), 2.86-2.80 (1H, m,  $\text{OCH}_2\text{CH}_2\text{N}$ ), 2.63-2.57 (1H, m,  $\text{CH}_3\text{CH}$ ), 2.32 (3H, s, Ar $\text{CH}_3$ ), 2.15 (3H, Ar $\text{CH}_3$ ), 1.22 (3H, d,  $J = 6.9$  Hz,  $\text{CH}_3\text{CH}$ );  $^{13}\text{C}$  NMR (62.9 MHz,  $\text{CDCl}_3$ )  $\delta$  173.0 (C), 142.4 (C), 139.8 (C), 138.5 (C), 137.8 (C), 128.9 (2 x CH), 128.2 (CH), 128.0 (CH), 126.8 (3 x CH), 123.4 (CH), 66.5 ( $\text{CH}_2$ ), 66.0 ( $\text{CH}_2$ ), 60.4 (CH), 46.2 ( $\text{CH}_2$ ), 41.9 ( $\text{CH}_2$ ), 39.7 (CH), 21.3 ( $\text{CH}_3$ ), 21.2 ( $\text{CH}_3$ ), 16.4 ( $\text{CH}_3$ ); HRMS (FAB) Exact mass calcd for  $\text{C}_{22}\text{H}_{29}\text{N}_2\text{O}_4\text{S}$   $[\text{M}+\text{H}]^+$ : 417.1843, found: 417.1851.

Data for **7e**: m.p. 124-126 °C; IR ( $\text{CHCl}_3$ ) 3206 (NH), 2965, 2921, 2857, 1616 (C=O), 1436, 1159, 1025  $\text{cm}^{-1}$ ;  $^1\text{H}$  NMR (360 MHz,  $\text{CDCl}_3$ )  $\delta$  7.54 (2H, dm,  $J = 8.3$  Hz, ArH), 7.11-7.09 (2H, m, ArH), 7.05-7.01 (1H, m, ArH), 6.93 (1H, app d,  $J = 7.5$  Hz, ArH), 6.86 (1H, app d,  $J = 7.6$  Hz, ArH), 6.73 (1H, br s, ArH), 5.76 (1H, d,  $J = 7.8$  Hz, NH), 4.37 (1H, t,  $J = 8.1$  Hz, CHNH), 3.69-3.64 (1H, m,  $\text{OCH}_2\text{CH}_2\text{N}$ ), 3.54-3.43 (3H, m,  $\text{OCH}_2\text{CH}_2\text{N}$ ), 3.30-3.12 (3H, m,  $\text{OCH}_2\text{CH}_2\text{N}$ ) 3.06-2.93 (2H, m,  $\text{OCH}_2\text{CH}_2\text{N}$  and  $\text{CH}_3\text{CH}$ ), 2.35 (3H, s, Ar $\text{CH}_3$ ), 2.16 (3H, s, Ar $\text{CH}_3$ ), 1.21 (3H, d,  $J = 6.7$  Hz,  $\text{CH}_3\text{CH}$ );  $^{13}\text{C}$  NMR (62.9 MHz,  $\text{CDCl}_3$ )  $\delta$  172.1 (C), 143.0 (C), 139.2 (C), 137.7 (C), 137.0 (C), 129.1

(2 x CH), 128.2 (2 x CH), 127.8 (CH), 127.3 (2 x CH), 123.8 (CH), 66.6 (CH<sub>2</sub>), 66.3 (CH<sub>2</sub>), 60.4 (CH), 46.1 (CH<sub>2</sub>), 41.9 (CH<sub>2</sub>), 41.3 (CH), 21.4 (CH<sub>3</sub>), 21.2 (CH<sub>3</sub>), 14.7 (CH<sub>3</sub>); HRMS (ES) Exact mass calcd. for C<sub>22</sub>H<sub>29</sub>N<sub>2</sub>O<sub>4</sub>S [M+H]<sup>+</sup>: 417.1843, found: 453.1843.

**(±)-N-[(1*S*,2*R*)-2-Methyl-1-(4-methylphenyl)-3-morpholin-4-yl-3-oxopropyl]-4-methylbenzenesulfonamide (**6f**) and (±)-N-[(1*R*,2*R*)-2-methyl-1-(4-methylphenyl)-3-morpholin-4-yl-3-oxopropyl]-4-methylbenzenesulfonamide (**7f**)**

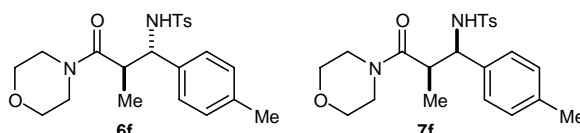

The General Procedure was followed using imine **9** (273 mg, 1.00 mmol) and the reaction mixture was purified by column chromatography (20% EtOAc/CH<sub>2</sub>Cl<sub>2</sub>) to give *anti*-Mannich product **6f** (279 mg, 67%) as a white solid followed by *syn*-Mannich product **7f** (46 mg, 11%) as a white solid.

Data for **6f**: m.p. 114-116 °C; IR (CHCl<sub>3</sub>) 3212 (NH), 2966, 2922, 2858, 1617 (C=O), 1437, 1325, 1159, 811 cm<sup>-1</sup>; <sup>1</sup>H NMR (360 MHz, CDCl<sub>3</sub>) δ 7.52 (2H, d, *J* = 8.2 Hz, ArH), 7.06 (2H, d, *J* = 8.2 Hz, ArH), 7.01 (1H, d, *J* = 8.3 Hz, NH), 6.93 (4H, s, ArH), 4.52 (1H, dd, *J* = 8.3, 4.0 Hz, CHNH), 3.59-3.48 (2H, m, OCH<sub>2</sub>CH<sub>2</sub>N), 3.36-3.26 (3H, m, OCH<sub>2</sub>CH<sub>2</sub>N), 3.14-3.04 (2H, m, OCH<sub>2</sub>CH<sub>2</sub>N), 2.87-2.81 (1H, m, OCH<sub>2</sub>CH<sub>2</sub>N), 2.76-2.70 (1H, m, CH<sub>3</sub>CH), 2.32 (3H, s, ArCH<sub>3</sub>), 2.25 (3H, s, ArCH<sub>3</sub>), 1.19 (3H, d, *J* = 6.9 Hz, CH<sub>3</sub>CH); <sup>13</sup>C NMR (62.9 MHz, CDCl<sub>3</sub>) δ 173.0 (C), 142.4 (C), 138.4 (C), 137.1 (C), 137.0 (C), 129.0 (2 x CH), 128.9 (2 x CH), 126.8 (2 x CH), 126.1 (2 x CH), 66.4 (CH<sub>2</sub>), 66.0 (CH<sub>2</sub>), 60.2 (CH), 46.1 (CH<sub>2</sub>), 41.8 (CH<sub>2</sub>), 39.8 (CH), 21.3 (CH<sub>3</sub>), 20.9 (CH<sub>3</sub>), 16.3 (CH<sub>3</sub>); HRMS (FAB) Exact mass calcd for C<sub>22</sub>H<sub>29</sub>N<sub>2</sub>O<sub>4</sub>S [M+H]<sup>+</sup>: 417.1843, found: 417.1844.

Data for **7f**: m.p. 183-185 °C; IR (CHCl<sub>3</sub>) 3212 (NH), 2967, 2922, 2858, 1616 (C=O), 1437, 1325, 1159, 1024 cm<sup>-1</sup>; <sup>1</sup>H NMR (360 MHz, CDCl<sub>3</sub>) δ 7.55 (2H, d, *J* = 8.1 Hz, ArH), 7.12 (2H, d, *J* = 8.1 Hz, ArH), 6.94 (4H, s, ArH), 5.73 (1H, d, *J* = 7.3 Hz, NH), 4.36 (1H, t, *J* = 7.8 Hz, CHNH), 3.54-3.38 (3H, m, OCH<sub>2</sub>CH<sub>2</sub>N), 3.34-3.20 (3H, m, OCH<sub>2</sub>CH<sub>2</sub>N), 3.17-3.11 (1H, m, OCH<sub>2</sub>CH<sub>2</sub>N), 3.09-2.95 (2H, m, OCH<sub>2</sub>CH<sub>2</sub>N and CH<sub>3</sub>CH), 2.36 (3H, s, ArCH<sub>3</sub>), 2.26 (3H, s, ArCH<sub>3</sub>), 1.19 (3H, d, *J* = 6.8 Hz, CH<sub>3</sub>CH); <sup>13</sup>C NMR (62.9 MHz, CDCl<sub>3</sub>) δ 172.2 (C), 143.0 (C), 137.2 (C), 136.9 (C), 136.4 (C), 129.2 (2 x CH), 128.8 (2 x CH), 127.3 (2 x CH), 126.9 (2 x CH), 66.6 (CH<sub>2</sub>), 66.3 (CH<sub>2</sub>), 60.1 (CH), 46.0 (CH<sub>2</sub>), 41.9 (CH<sub>2</sub>), 41.4 (CH), 21.4 (CH<sub>3</sub>), 21.0 (CH<sub>3</sub>) 14.5 (CH<sub>3</sub>); HRMS (FAB) Exact mass calcd for C<sub>22</sub>H<sub>29</sub>N<sub>2</sub>O<sub>4</sub>S [M+H]<sup>+</sup>: 417.1843, found: 417.1836.

**(±)-N-[(1S,2R)-1-(4-Ethylphenyl)-2-methyl-3-morpholin-4-yl-3-oxopropyl]-4-methylbenzenesulfonamide (6g)**

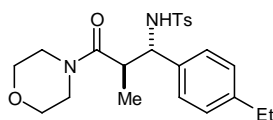

The General Procedure was followed using imine **10** (287 mg, 1.00 mmol) and the reaction mixture was purified by column chromatography (20% EtOAc/CH<sub>2</sub>Cl<sub>2</sub>) to give *anti*-Mannich product **6g** (334 mg, 78%) as a white solid. The *syn*-Mannich product could not be isolated in pure form.

m.p. 88-90 °C; IR (CHCl<sub>3</sub>) 3276 (NH), 2965, 2929, 2859, 1618 (C=O), 1446, 1159 cm<sup>-1</sup>; <sup>1</sup>H NMR (360 MHz, CDCl<sub>3</sub>) δ 7.51 (2H, d, *J* = 8.2 Hz, ArH), 7.05 (2H, d, *J* = 8.2 Hz, ArH), 7.02 (1H, d, *J* = 8.5 Hz, NH), 6.94 (4H, s, ArH), 4.55 (1H, dd, *J* = 8.3, 4.0 Hz, CHNH), 3.67-3.60 (1H, m, OCH<sub>2</sub>CH<sub>2</sub>N), 3.56-3.49 (1H, m, OCH<sub>2</sub>CH<sub>2</sub>N), 3.34-3.20 (3H, m, OCH<sub>2</sub>CH<sub>2</sub>N), 3.12-3.04 (2H, m, OCH<sub>2</sub>CH<sub>2</sub>N), 2.87-2.81 (1H, m, OCH<sub>2</sub>CH<sub>2</sub>N), 2.66-2.60 (1H, m, CH<sub>3</sub>CH), 2.54 (2H, q, *J* = 7.6 Hz, CH<sub>2</sub>CH<sub>3</sub>), 2.31 (3H, s, ArCH<sub>3</sub>), 1.21 (3H, d, *J* = 6.9 Hz, CH<sub>3</sub>CH), 1.15 (3H, t, *J* = 7.6 Hz, CH<sub>2</sub>CH<sub>3</sub>); <sup>13</sup>C NMR (62.9 MHz, CDCl<sub>3</sub>) δ 173.0 (C), 143.5 (C), 142.3 (C), 138.4 (C), 137.2 (C), 129.0 (2 x CH), 127.7 (2 x CH), 126.8 (2 x CH), 126.2 (2 x CH), 66.4 (CH<sub>2</sub>), 66.0 (CH<sub>2</sub>), 60.2 (CH), 46.2 (CH<sub>2</sub>), 41.9 (CH<sub>2</sub>), 39.8 (CH), 28.4 (CH<sub>2</sub>), 21.3 (CH<sub>3</sub>), 16.3 (CH<sub>3</sub>), 15.9 (CH<sub>3</sub>); HRMS (FAB) Exact mass calcd for C<sub>23</sub>H<sub>31</sub>N<sub>2</sub>O<sub>4</sub>S [M+H]<sup>+</sup>: 431.2000, found: 431.1985.

**(±)-N-[(1S,2R)-1-(2-Methoxyphenyl)-2-methyl-3-morpholin-4-yl-3-oxopropyl]-4-methylbenzenesulfonamide (6h) and (±)-N-[(1R,2R)-1-(2-methoxyphenyl)-2-methyl-3-morpholin-4-yl-3-oxopropyl]-4-methylbenzenesulfonamide (7h)**

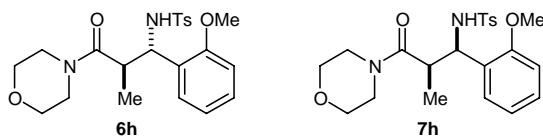

The General Procedure was followed using imine **11** (289 mg, 1.00 mmol) and the reaction mixture was purified by column chromatography (20% EtOAc/CH<sub>2</sub>Cl<sub>2</sub>) to give *anti*-Mannich product **6h** (213 mg, 49%) as a white solid followed by *syn*-Mannich product **7h** (30 mg, 7%) as a white solid.

Data for **6h**: m.p. 166-168 °C; IR (CHCl<sub>3</sub>) 3287 (NH), 2965, 2924, 2857, 1618 (C=O), 1491, 1464, 1159, 668 cm<sup>-1</sup>; <sup>1</sup>H NMR (360 MHz, CDCl<sub>3</sub>) δ 7.57 (2H, dm, *J* = 8.3 Hz, ArH), 7.15-7.10 (1H, m, ArH), 7.10-7.08 (2H, m, ArH), 7.01-6.99 (1H, m, ArH), 6.82 (1H, d, *J* = 8.7 Hz, NH), 6.77-6.69 (2H, m, ArH), 4.87 (1H, dd, *J* = 8.7, 4.5 Hz, CHNH), 3.82 (3H, s, OCH<sub>3</sub>), 3.66-3.48 (2H, m, OCH<sub>2</sub>CH<sub>2</sub>N), 3.37-3.09 (5H, m, OCH<sub>2</sub>CH<sub>2</sub>N), 2.92-2.86 (1H, m, OCH<sub>2</sub>CH<sub>2</sub>N), 2.68-2.62 (1H, m, CH<sub>3</sub>CH), 2.32

(3H, s, ArCH<sub>3</sub>), 1.10 (3H, d,  $J = 6.9$  Hz, CH<sub>3</sub>CH); <sup>13</sup>C NMR (62.9 MHz, CDCl<sub>3</sub>)  $\delta$  173.3 (C), 155.5 (C), 142.5 (C), 138.3 (C), 129.0 (2 x CH), 128.4 (CH), 127.8 (C and CH), 126.8 (2 x CH), 120.5 (CH), 110.0 (CH), 66.5 (CH<sub>2</sub>), 66.1 (CH<sub>2</sub>), 55.5 (CH<sub>3</sub>), 55.3 (CH), 46.1 (CH<sub>2</sub>), 41.9 (CH<sub>2</sub>), 36.4 (CH), 21.3 (CH<sub>3</sub>), 16.0 (CH<sub>3</sub>); HRMS (ES) Exact mass calcd. for C<sub>22</sub>H<sub>29</sub>N<sub>2</sub>O<sub>5</sub>S [M+H]<sup>+</sup>: 433.1792, found: 433.1792.

Data for **7h**: m.p. 125-126 °C; IR (CHCl<sub>3</sub>) 3286 (NH), 2966, 2857, 1618 (C=O), 1464, 1240, 1159 cm<sup>-1</sup>; <sup>1</sup>H NMR (360 MHz, CDCl<sub>3</sub>)  $\delta$  7.49 (2H, d,  $J = 8.1$  Hz, ArH), 7.13-7.08 (1H, m, ArH), 7.03 (2H, d,  $J = 8.1$  Hz, ArH), 6.91-6.86 (1H, m, ArH), 6.71-6.67 (2H, m, ArH), 5.76 (1H, d,  $J = 9.2$  Hz, NH), 4.42 (1H, app t,  $J = 9.0$  Hz, CHNH), 3.79 (3H, s, OCH<sub>3</sub>), 3.52-3.42 (3H, m, OCH<sub>2</sub>CH<sub>2</sub>N), 3.33-3.24 (2H, m, OCH<sub>2</sub>CH<sub>2</sub>N), 3.19-3.12 (2H, m, OCH<sub>2</sub>CH<sub>2</sub>N), 3.05-2.98 (1H, m, OCH<sub>2</sub>CH<sub>2</sub>N), 2.85-2.79 (1H, m, CH<sub>3</sub>CH), 2.30 (3H, s, ArCH<sub>3</sub>), 1.23 (3H, d,  $J = 6.7$  Hz, CH<sub>3</sub>CH); <sup>13</sup>C NMR (62.9 MHz, CDCl<sub>3</sub>)  $\delta$  172.4 (C), 155.8 (C), 142.8 (C), 137.1 (C), 130.9 (C), 129.0 (2 x CH), 128.7 (CH), 127.0 (2 x CH), 126.1 (CH), 120.7 (CH), 110.2 (CH), 66.6 (CH<sub>2</sub>), 66.4 (CH<sub>2</sub>), 55.2 (CH and CH<sub>3</sub>), 45.9 (CH<sub>2</sub>), 41.9 (CH<sub>2</sub>), 38.7 (CH), 21.4 (CH<sub>3</sub>), 14.7 (CH<sub>3</sub>); HRMS (FAB) Exact mass calcd for C<sub>22</sub>H<sub>29</sub>N<sub>2</sub>O<sub>5</sub>S [M+H]<sup>+</sup>: 433.1792, found: 433.1787.

**(±)-N-[(1S,2R)-1-(4-Methoxyphenyl)-2-methyl-3-morpholin-4-yl-3-oxopropyl]-4-methylbenzenesulfonamide (6i) and (±)-N-[(1R,2R)-1-(4-methoxyphenyl)-2-methyl-3-morpholin-4-yl-3-oxopropyl]-4-methylbenzenesulfonamide (7i)**

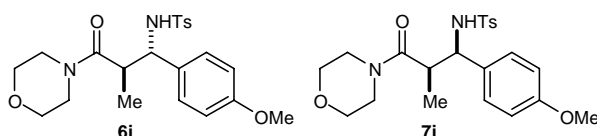

The General Procedure was followed using imine **12** (289 mg, 1.00 mmol) and the reaction mixture was purified by column chromatography (20% EtOAc/CH<sub>2</sub>Cl<sub>2</sub>) to give *anti*-Mannich product **6i** (233 mg, 54%) as a white solid followed by *syn*-Mannich product **7i** (34 mg, 8%) as a white solid.

Data for **6i**: m.p. 106-108 °C; IR (CHCl<sub>3</sub>) 3273 (NH), 2923, 2359, 1614 (C=O), 1513, 1159, 1030 cm<sup>-1</sup>; <sup>1</sup>H NMR (360 MHz, CDCl<sub>3</sub>)  $\delta$  7.51 (2H, d,  $J = 8.2$  Hz, ArH), 7.07 (2H, d,  $J = 8.2$  Hz, ArH), 7.01 (1H, d,  $J = 8.3$  Hz, NH), 6.95 (2H, dm,  $J = 8.7$  Hz, ArH), 6.65 (2H, dm,  $J = 8.7$  Hz, ArH), 4.52 (1H, dd,  $J = 8.2, 4.1$  Hz, CHNH), 3.73 (3H, s, OCH<sub>3</sub>), 3.59-3.49 (2H, m, OCH<sub>2</sub>CH<sub>2</sub>N), 3.39-3.30 (3H, m, OCH<sub>2</sub>CH<sub>2</sub>N), 3.17-3.02 (2H, m, OCH<sub>2</sub>CH<sub>2</sub>N), 2.91-2.80 (2H, m, OCH<sub>2</sub>CH<sub>2</sub>N and CH<sub>3</sub>CH), 2.32 (3H, s, ArCH<sub>3</sub>), 1.20 (3H, d,  $J = 6.9$  Hz, CH<sub>3</sub>CH); <sup>13</sup>C NMR (62.9 MHz, CDCl<sub>3</sub>)  $\delta$  173.1 (C), 158.8 (C), 142.4 (C), 138.4 (C), 132.2 (C), 129.0 (2 x CH), 127.4 (2 x CH), 126.8 (2 x CH), 113.6 (2 x CH), 66.5



(CH<sub>2</sub>), 66.1 (CH<sub>2</sub>), 59.9 (CH), 55.2 (CH<sub>3</sub>), 46.1 (CH<sub>2</sub>), 41.8 (CH<sub>2</sub>), 40.0 (CH), 21.3 (CH<sub>3</sub>), 16.3 (CH<sub>3</sub>); HRMS (ES) Exact mass calcd for C<sub>22</sub>H<sub>29</sub>N<sub>2</sub>O<sub>5</sub>S [M+H]<sup>+</sup>: 433.1792, found: 433.1792.

Data for **7i**: m.p. 97-98 °C; IR (CHCl<sub>3</sub>) 3284 (NH), 2964, 2855, 1614 (C=O), 1456, 1464, 1158, 1025 cm<sup>-1</sup>; <sup>1</sup>H NMR (360 MHz, CDCl<sub>3</sub>) δ 7.56-7.54 (2H, m, ArH), 7.14 (2H, d, *J* = 7.9 Hz, ArH), 6.99-6.95 (2H, m, ArH), 6.70-6.65 (2H, m, ArH), 5.55 (1H, d, *J* = 7.0 Hz, NH), 4.35 (1H, app t, *J* = 7.5 Hz, CHNH), 3.75 (3H, s, OCH<sub>3</sub>) 3.56-3.47 (2H, m, OCH<sub>2</sub>CH<sub>2</sub>N), 3.40-3.35 (2H, m, OCH<sub>2</sub>CH<sub>2</sub>N), 3.33-3.26 (2H, m, OCH<sub>2</sub>CH<sub>2</sub>N), 3.22-3.13 (2H, m, OCH<sub>2</sub>CH<sub>2</sub>N), 2.98 (1H, qd, *J* = 13.9, 6.9 Hz, CH<sub>3</sub>CH), 2.37 (3H, s, ArCH<sub>3</sub>), 1.17 (3H, d, *J* = 6.9 Hz, CH<sub>3</sub>CH); <sup>13</sup>C NMR (62.9 MHz, CDCl<sub>3</sub>) δ 172.2 (C), 158.8 (C), 143.0 (C), 137.0 (C), 131.5 (C), 129.2 (2 x CH), 128.1 (2 x CH), 127.3 (2 x CH), 113.5 (2 x CH), 66.6 (CH<sub>2</sub>), 66.4 (CH<sub>2</sub>), 59.9 (CH), 55.2 (CH<sub>3</sub>), 46.0 (CH<sub>2</sub>), 41.9 (CH<sub>2</sub>), 41.5 (CH), 21.4 (CH<sub>3</sub>), 14.7 (CH<sub>3</sub>); HRMS (FAB) Exact mass calcd for C<sub>22</sub>H<sub>29</sub>N<sub>2</sub>O<sub>5</sub>S [M+H]<sup>+</sup>: 433.1792, found: 433.1792.

**(±)-*N*-[(1*S*,2*R*)-1-(4-Bromophenyl)-2-methyl-3-morpholin-4-yl-3-oxopropyl]-4-methylbenzenesulfonamide (**6j**)**

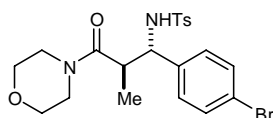

The General Procedure was followed using imine **13** (338 mg, 1.00 mmol) and the reaction mixture was purified by column chromatography (20% EtOAc/CH<sub>2</sub>Cl<sub>2</sub>) to give *anti*-Mannich product **6j** (210 mg, 44%) as a white solid. The *syn*-Mannich product could not be isolated in pure form.

m.p. 128-130 °C; IR (CHCl<sub>3</sub>) 3144 (NH), 2983, 2898, 2858, 1615 (C=O), 1469, 1159, 910 cm<sup>-1</sup>; <sup>1</sup>H NMR (360 MHz, CDCl<sub>3</sub>) δ 7.49 (2H, dm, *J* = 8.2 Hz, ArH), 7.23 (2H, dm, *J* = 8.5 Hz, ArH), 7.12 (1H, d, *J* = 8.4 Hz, NH), 7.08 (2H, d, *J* = 8.2 Hz, ArH), 6.92 (2H, dm, *J* = 8.5 Hz, ArH), 4.51 (1H, dd, *J* = 8.4, 4.0 Hz, CHNH), 3.57-3.46 (2H, m, OCH<sub>2</sub>CH<sub>2</sub>N), 3.42-3.31 (3H, m, OCH<sub>2</sub>CH<sub>2</sub>N), 3.19-3.12 (1H, m, OCH<sub>2</sub>CH<sub>2</sub>N), 3.04 (1H, dq, *J* = 6.9, 4.2 Hz, CH<sub>3</sub>CH), 2.95-2.89 (2H, m, OCH<sub>2</sub>CH<sub>2</sub>N), 2.34 (3H, s, ArCH<sub>3</sub>), 1.19 (3H, d, *J* = 6.9 Hz, CH<sub>3</sub>CH); <sup>13</sup>C NMR (62.9 MHz, CDCl<sub>3</sub>) δ 172.7 (C), 142.8 (C), 139.0 (C), 138.1 (C), 131.2 (2 x CH), 129.1 (2 x CH), 128.2 (2 x CH), 126.7 (2 x CH), 121.1 (C), 66.5 (CH<sub>2</sub>), 66.1 (CH<sub>2</sub>), 59.9 (CH), 46.1 (CH<sub>2</sub>), 41.8 (CH<sub>2</sub>), 39.8 (CH), 21.3 (CH<sub>3</sub>), 16.3 (CH<sub>3</sub>); HRMS (FAB) Exact mass calcd for C<sub>21</sub>H<sub>26</sub><sup>79</sup>BrN<sub>2</sub>O<sub>4</sub>S [M+H]<sup>+</sup>: 481.0792, found: 481.0792.

(±)-*N*-[(1*S*,2*R*)-2-Methyl-3-morpholin-4-yl-1-naphthalen-1-yl-3-oxopropyl]-4-methylbenzenesulfonamide (**6l**) and (±)-*N*-[(1*R*,2*R*)-2-methyl-3-morpholin-4-yl-1-naphthalen-1-yl-3-oxopropyl]-4-methylbenzenesulfonamide (**7l**)

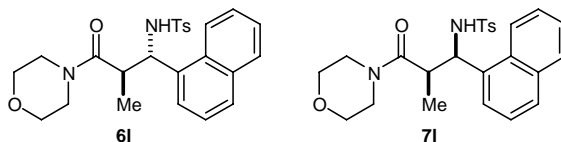

The General Procedure was followed using imine **15** (309 mg, 1.00 mmol) and the reaction mixture was purified by column chromatography (20% EtOAc/CH<sub>2</sub>Cl<sub>2</sub>) to give *anti*-Mannich product **6l** (221 mg, 49%) as a white solid followed by *syn*-Mannich product **7l** (50 mg, 11%) as a white solid.

Data for **6l**: m.p. 102-104 °C; IR (CHCl<sub>3</sub>) 3284 (NH), 2966, 2922, 2587, 1618 (C=O), 1444, 1333, 913 cm<sup>-1</sup>; <sup>1</sup>H NMR (360 MHz, CDCl<sub>3</sub>) δ 7.91 (1H, d, *J* = 8.4 Hz, ArH), 7.86-7.83 (1H, m, ArH), 7.68 (1H, d, *J* = 7.9 Hz, ArH), 7.58-7.47 (4H, m, ArH), 7.28-7.19 (3H, m, ArH and NH), 7.02 (2H, d, *J* = 8.0 Hz, ArH), 5.43 (1H, dd, *J* = 7.9, 3.7 Hz, CHNH), 3.62-3.57 (1H, m, OCH<sub>2</sub>CH<sub>2</sub>N), 3.47-3.38 (2H, m, OCH<sub>2</sub>CH<sub>2</sub>N), 3.13-3.02 (2H, m, OCH<sub>2</sub>CH<sub>2</sub>N), 2.94-2.89 (1H, m, OCH<sub>2</sub>CH<sub>2</sub>N), 2.77-2.70 (1H, m, OCH<sub>2</sub>CH<sub>2</sub>N), 2.29 (3H, s, ArCH<sub>3</sub>), 2.27-2.22 (1H, m, OCH<sub>2</sub>CH<sub>2</sub>N), 1.98-1.92 (1H, m, CH<sub>3</sub>CH), 1.33 (3H, d, *J* = 6.8 Hz, CH<sub>3</sub>CH); <sup>13</sup>C NMR (62.9 MHz, CDCl<sub>3</sub>) δ 172.9 (C), 142.6 (C), 138.4 (C), 135.0 (C), 133.6 (C), 129.7 (C), 129.3 (CH), 129.1 (2 x CH), 128.0 (CH), 126.7 (3 x CH), 125.6 (CH), 125.2 (CH), 124.3 (CH), 121.3 (CH), 66.4 (CH<sub>2</sub>), 65.5 (CH<sub>2</sub>), 56.4 (CH), 46.0 (CH<sub>2</sub>), 41.8 (CH<sub>2</sub>), 37.4 (CH), 21.3 (CH<sub>3</sub>), 16.3 (CH<sub>3</sub>); HRMS (ES) Exact mass calcd. for C<sub>25</sub>H<sub>29</sub>N<sub>2</sub>O<sub>4</sub>S [M+H]<sup>+</sup>: 453.1843, found: 453.1841.

Data for **7l**: m.p. 94-96 °C; IR (CHCl<sub>3</sub>) 3218 (NH), 2923, 2857, 2359, 1616 (C=O), 1435, 1158, 914 cm<sup>-1</sup>; <sup>1</sup>H NMR (360 MHz, CDCl<sub>3</sub>) δ 7.90-7.87 (1H, m, ArH), 7.76-7.72 (1H, m, ArH), 7.65 (1H, d, *J* = 8.3 Hz, ArH), 7.45-7.40 (3H, m, ArH), 7.38-7.35 (2H, m, ArH), 7.31-7.24 (1H, m, ArH), 6.84 (2H, d, *J* = 7.9 Hz, ArH), 6.10 (1H, br s, NH), 5.21 (1H, br s, CHNH), 3.70-2.75 (9H, br m, 2 x OCH<sub>2</sub>CH<sub>2</sub>N and CH<sub>3</sub>CH), 2.21 (3H, s, ArCH<sub>3</sub>), 1.31 (3H, d, *J* = 6.6 Hz, CH<sub>3</sub>CH); <sup>13</sup>C NMR (62.9 MHz, CDCl<sub>3</sub>) δ 172.2 (C), 142.8 (C), 136.3 (C), 133.6 (C), 130.4 (C), 128.8 (C and 2 x CH), 128.2 (CH), 127.1 (2 x CH), 126.2 (CH), 125.5 (CH), 124.9 (CH), 122.6 (CH), 66.4 (CH<sub>2</sub>), 66.1 (CH<sub>2</sub>), 46.1 (CH<sub>2</sub>), 41.9 (CH<sub>2</sub>), 40.2 (CH), 21.3 (CH<sub>3</sub>), 15.0 (CH<sub>3</sub>); HRMS (ES) Exact mass calcd. for C<sub>25</sub>H<sub>29</sub>N<sub>2</sub>O<sub>4</sub>S [M+H]<sup>+</sup>: 453.1843, found: 453.1845.

(±)-*N*-[(1*S*,2*R*)-1-Furan-2-yl-2-methyl-3-morpholin-4-yl-3-oxopropyl]-4-methylbenzenesulfonamide (**6m**) and (±)-*N*-[(1*R*,2*R*)-1-furan-2-yl-2-methyl-3-morpholin-4-yl-3-oxopropyl]-4-methylbenzenesulfonamide (**7m**)

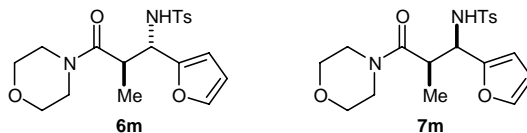

The General Procedure was followed using imine **16** (249 mg, 1.00 mmol) and the reaction mixture was purified by column chromatography (50% EtOAc/CH<sub>2</sub>Cl<sub>2</sub>) to give *anti*-Mannich product **6m** (141 mg, 36%) as a pale yellow solid followed by *syn*-Mannich product **7m** (67 mg, 17%) as a pale yellow solid.

Data for **6m**: m.p. 144-146 °C; IR (CHCl<sub>3</sub>) 3153 (NH), 2922, 2359, 2341, 1615 (C=O), 1456, 1159, 668 cm<sup>-1</sup>; <sup>1</sup>H NMR (360 MHz, CDCl<sub>3</sub>) δ 7.64 (2H, dm, *J* = 8.3 Hz, ArH), 7.20-7.16 (3H, m, ArH and CH), 6.82 (1H, d, *J* = 8.6 Hz, NH), 6.15 (1H, dd, *J* = 3.3, 1.8 Hz, CH), 5.94-5.93 (1H, m, CH), 4.61 (1H, dd, *J* = 8.6, 4.4 Hz, CHNH), 3.63-3.27 (9H, m, 2 x OCH<sub>2</sub>CH<sub>2</sub>N and CH<sub>3</sub>CH), 2.37 (3H, s, ArCH<sub>3</sub>), 1.15 (3H, d, *J* = 7.1 Hz, CH<sub>3</sub>CH); <sup>13</sup>C NMR (62.9 MHz, CDCl<sub>3</sub>) δ 173.1 (C), 153.2 (C), 142.7 (C), 141.5 (CH), 138.3 (C), 129.2 (2 x CH), 126.8 (2 x CH), 110.5 (CH), 107.2 (CH), 66.7 (CH<sub>2</sub>), 66.4 (CH<sub>2</sub>), 54.7 (CH), 46.2 (CH<sub>2</sub>), 42.0 (CH<sub>2</sub>), 37.4 (CH), 21.4 (CH<sub>3</sub>), 15.4 (CH<sub>3</sub>); HRMS (FAB) Exact mass calcd. for C<sub>19</sub>H<sub>25</sub>N<sub>2</sub>O<sub>5</sub>S [M+H]<sup>+</sup>: 393.1479, found: 393.1482.

Data for **7m**: m.p. 133-135 °C; IR (CHCl<sub>3</sub>) 3262 (NH), 2857, 2858, 1620 (C=O), 1444, 1332, 1159 cm<sup>-1</sup>; <sup>1</sup>H NMR (360 MHz, CDCl<sub>3</sub>) δ 7.58 (2H, dm, *J* = 8.3 Hz, ArH), 7.17-7.14 (2H, m, ArH), 7.10 (1H, dd, *J* = 1.8, 0.8 Hz, CH), 6.07 (1H, dd, *J* = 3.2, 1.8 Hz, CH), 5.82 (1H, d, *J* = 3.2 Hz, CH), 5.58 (1H, d, *J* = 9.1 Hz, NH), 4.56 (1H, app t, *J* = 9.1 Hz, CHNH), 3.67-3.26 (8H, m, OCH<sub>2</sub>CH<sub>2</sub>N), 3.18 (1H, qd, *J* = 9.1, 6.8 Hz, CH<sub>3</sub>CH), 2.36 (3H, s, ArCH<sub>3</sub>), 1.23 (3H, d, *J* = 6.8 Hz, CH<sub>3</sub>CH); <sup>13</sup>C NMR (62.9 MHz, CDCl<sub>3</sub>) δ 171.9 (C), 151.5 (C), 143.0 (C), 141.4 (CH), 137.1 (C), 129.2 (2 x CH), 127.0 (2 x CH), 110.3 (CH), 107.9 (CH), 66.7 (CH<sub>2</sub>), 66.5 (CH<sub>2</sub>), 54.1 (CH), 46.0 (CH<sub>2</sub>), 42.0 (CH<sub>2</sub>), 39.6 (CH), 21.4 (CH<sub>3</sub>), 14.8 (CH<sub>3</sub>); HRMS (FAB) Exact mass calcd. for C<sub>19</sub>H<sub>25</sub>N<sub>2</sub>O<sub>5</sub>S [M+H]<sup>+</sup>: 393.1479, found: 393.1486.

### Stereochemical Determinations

- The relative stereochemistries of **6b**, **6h** and **6i** were determined by X-ray crystallography.

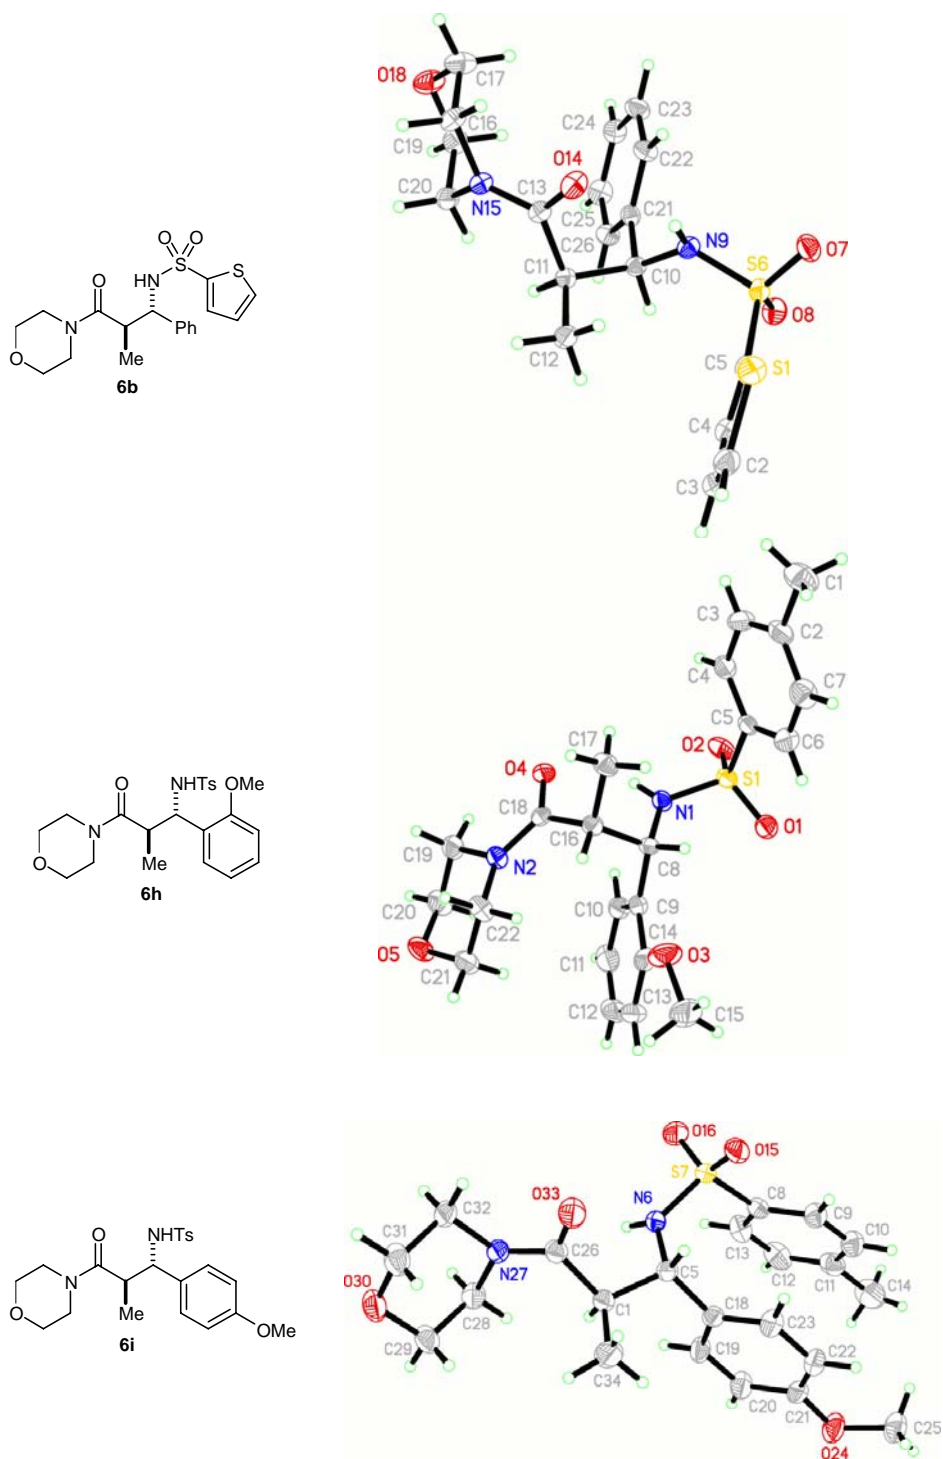

- The relative stereochemistries of the remaining products were assigned by analogy.

## NMR Spectra of New Compounds

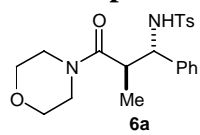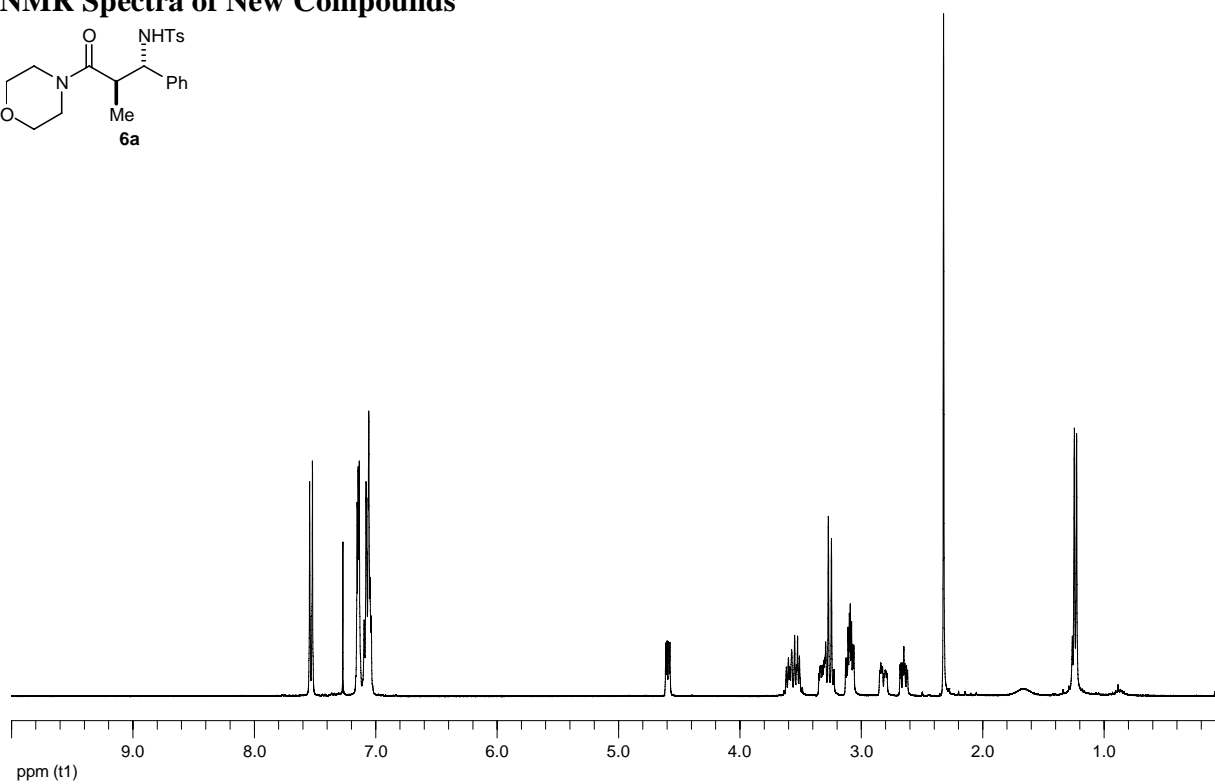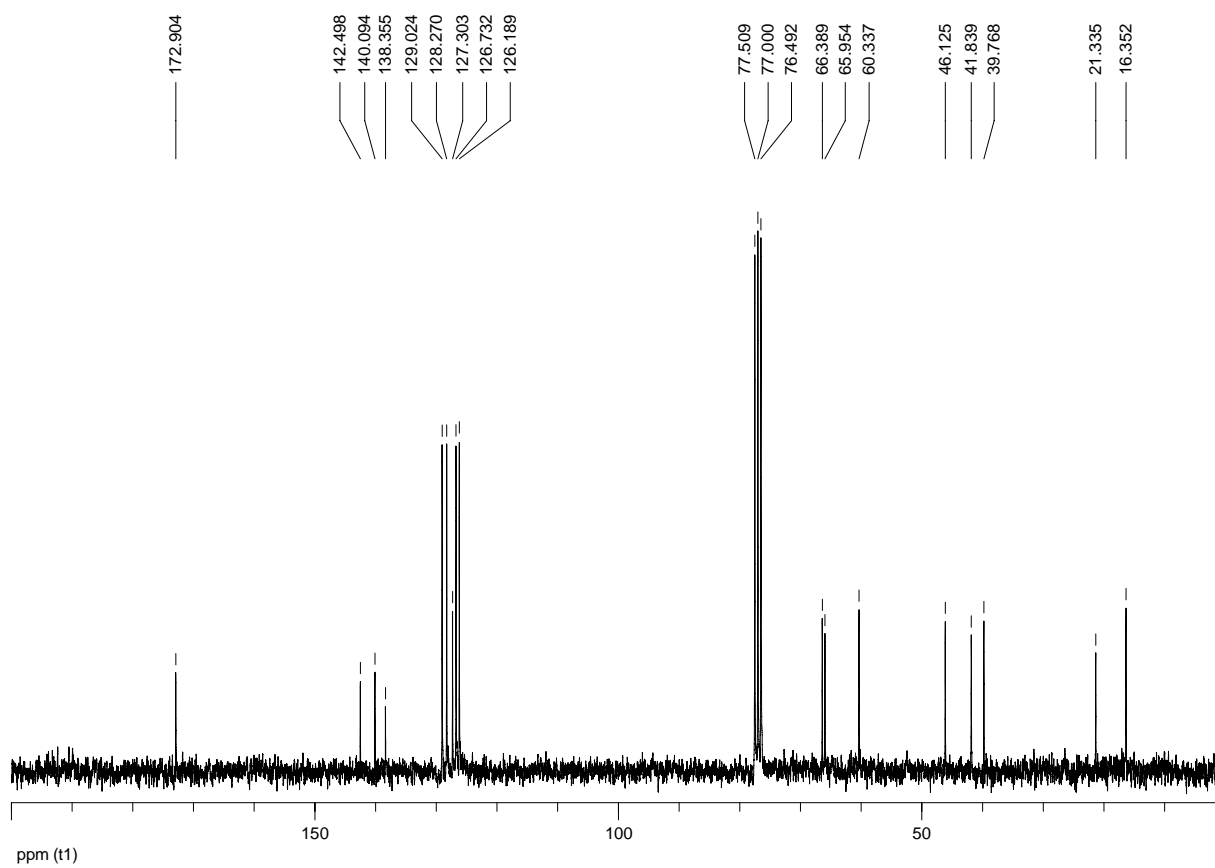

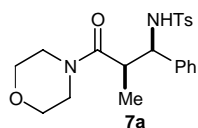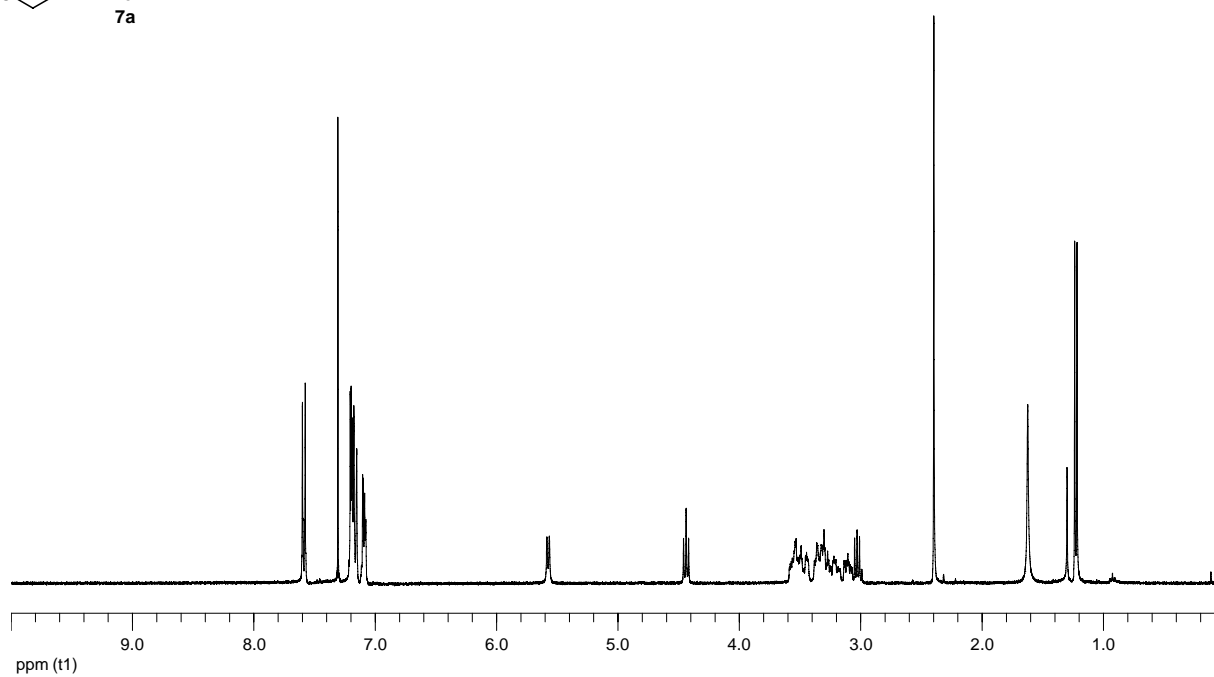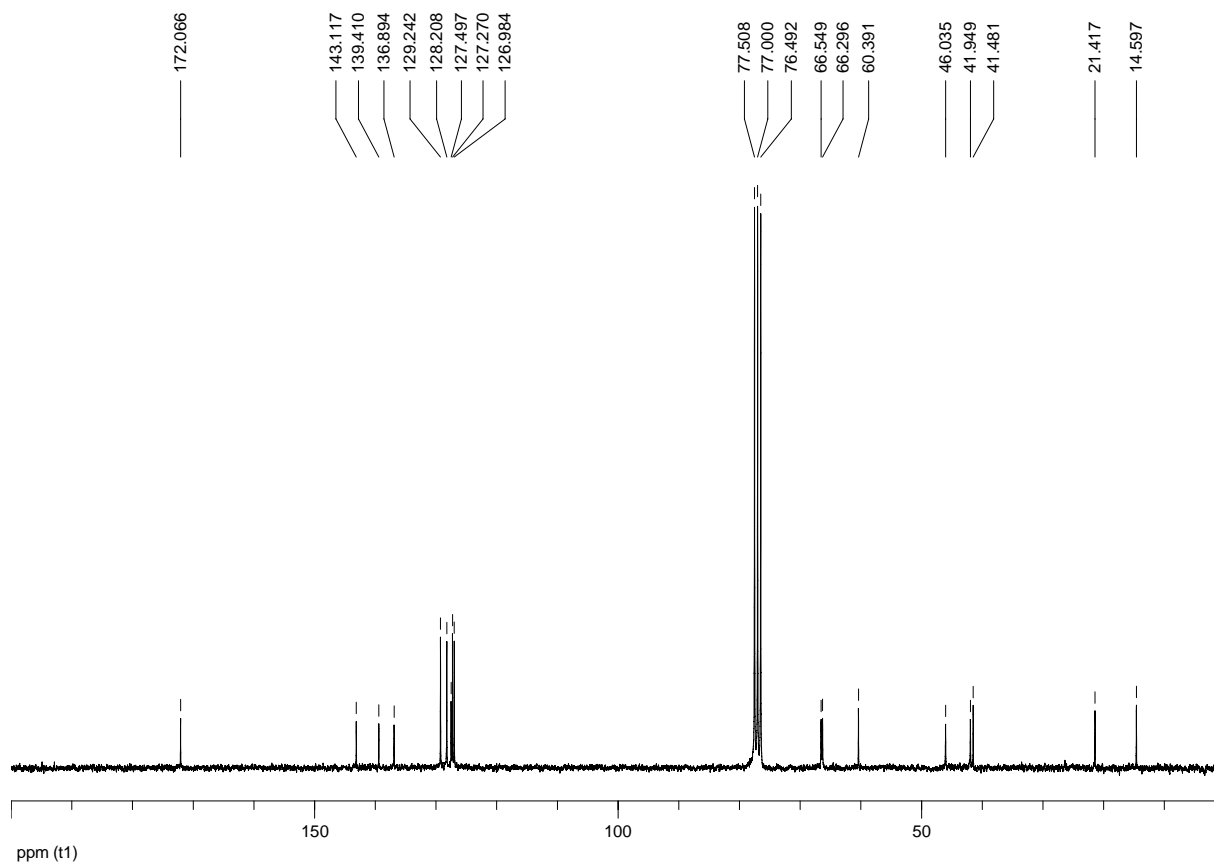

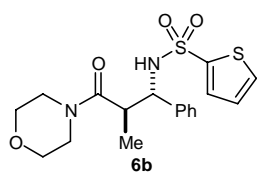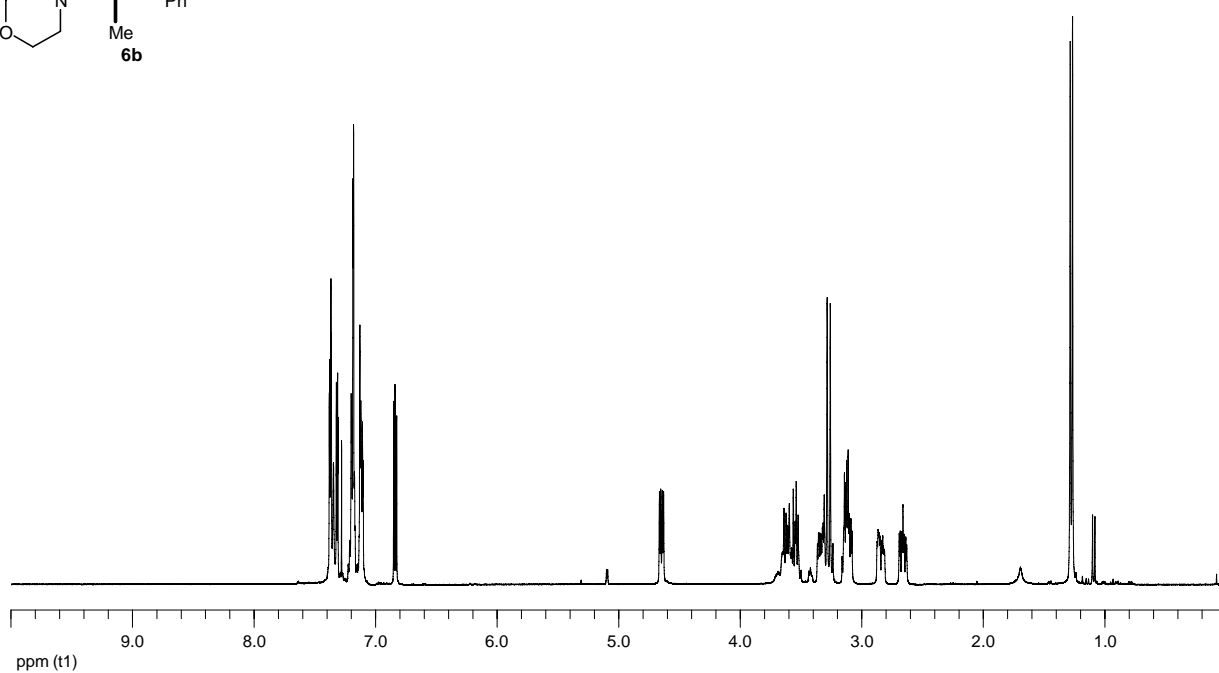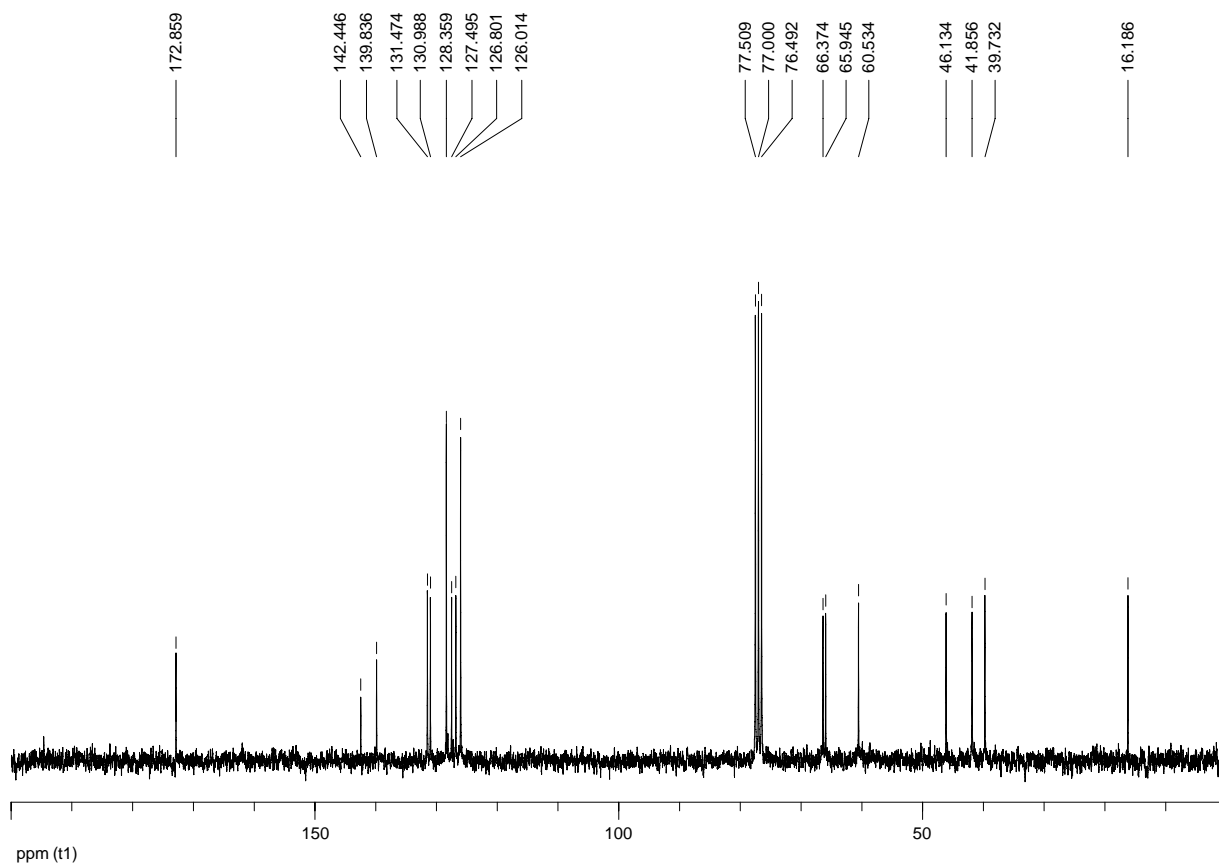

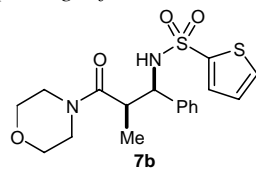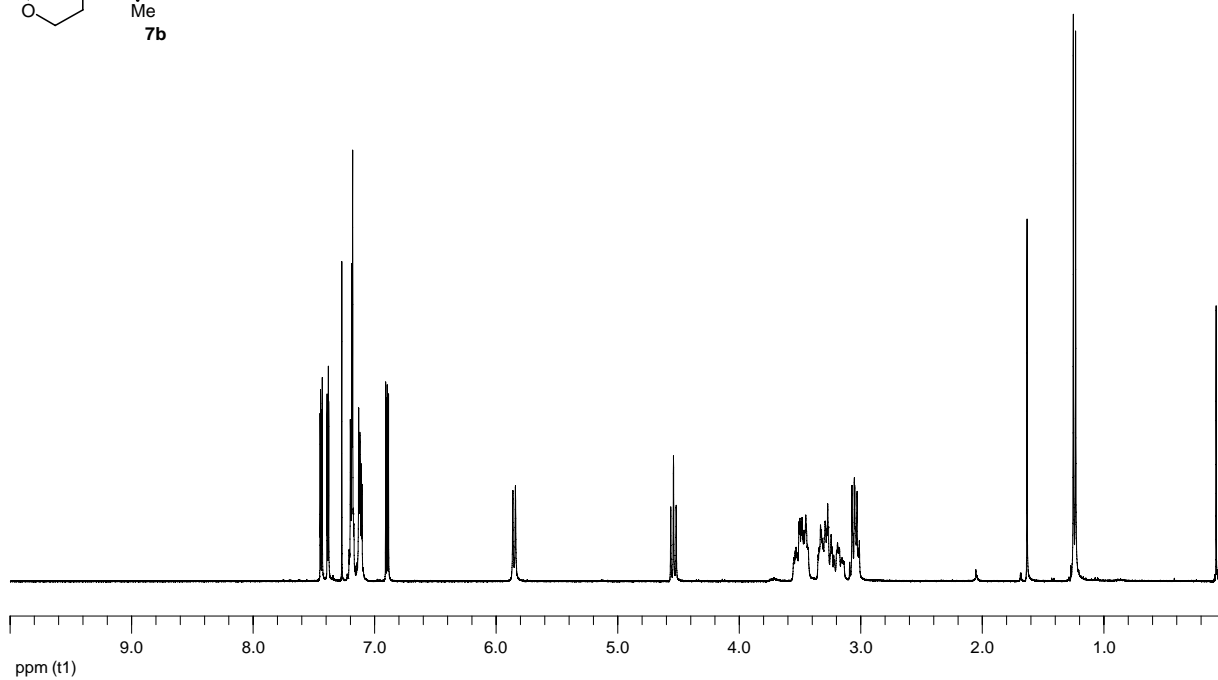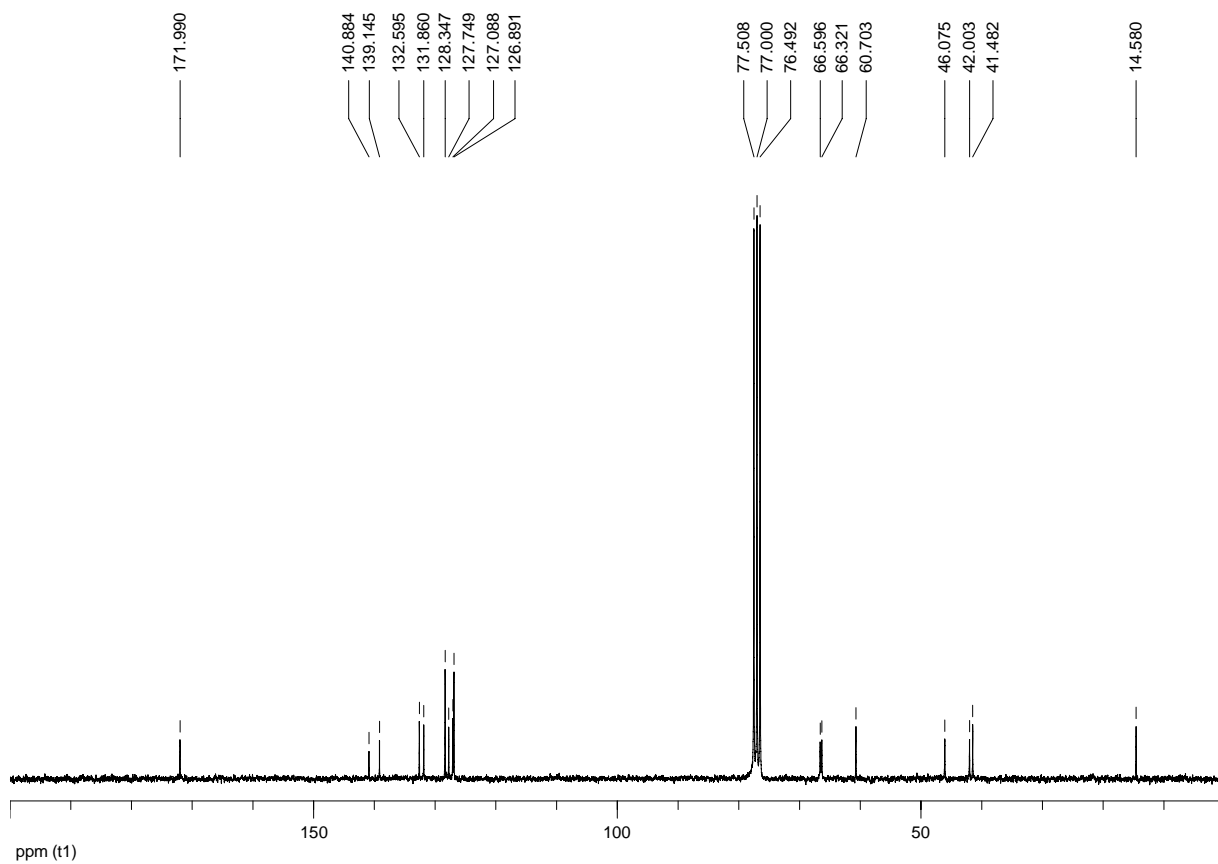



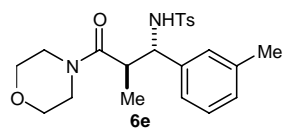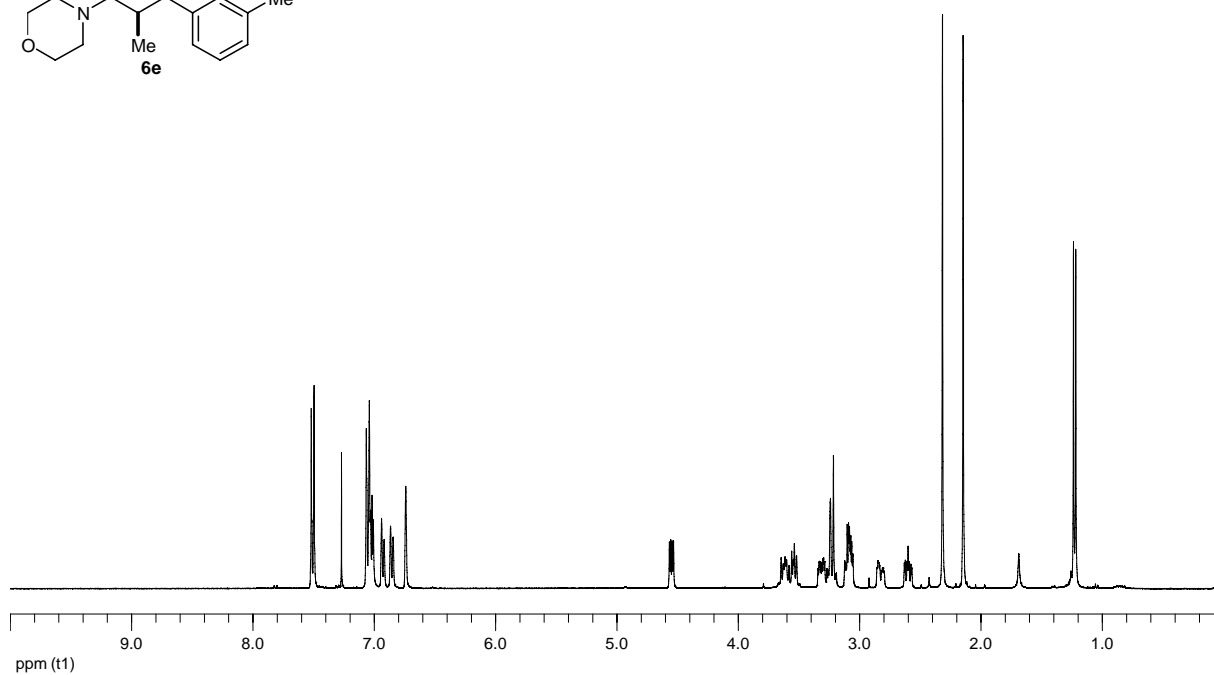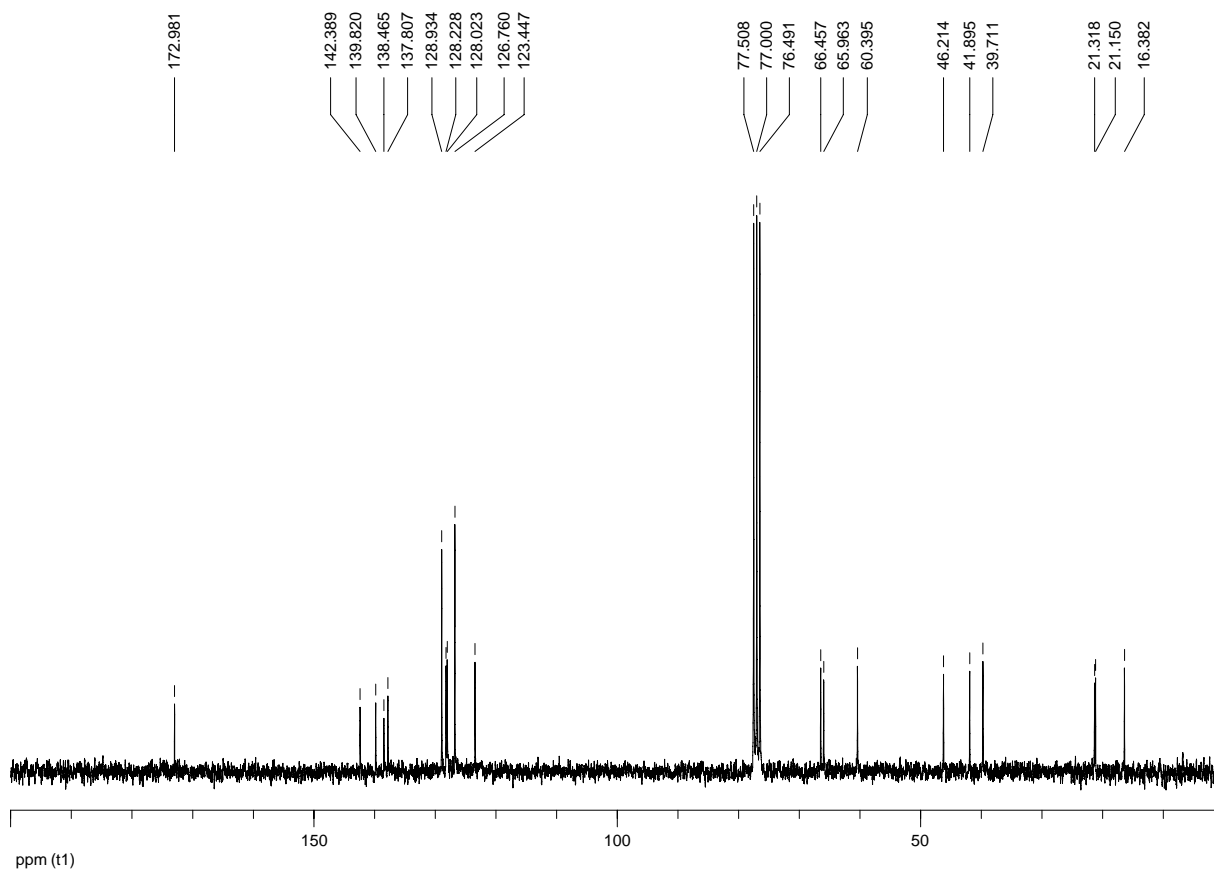

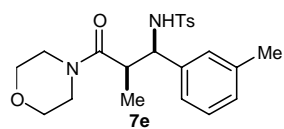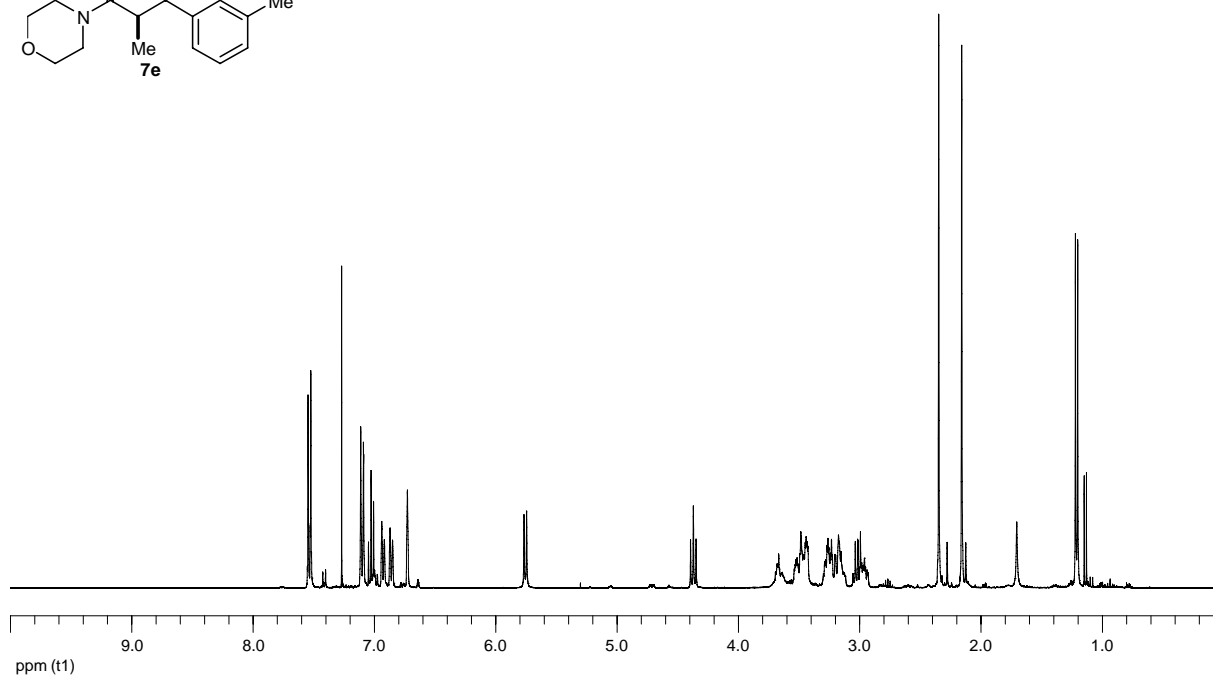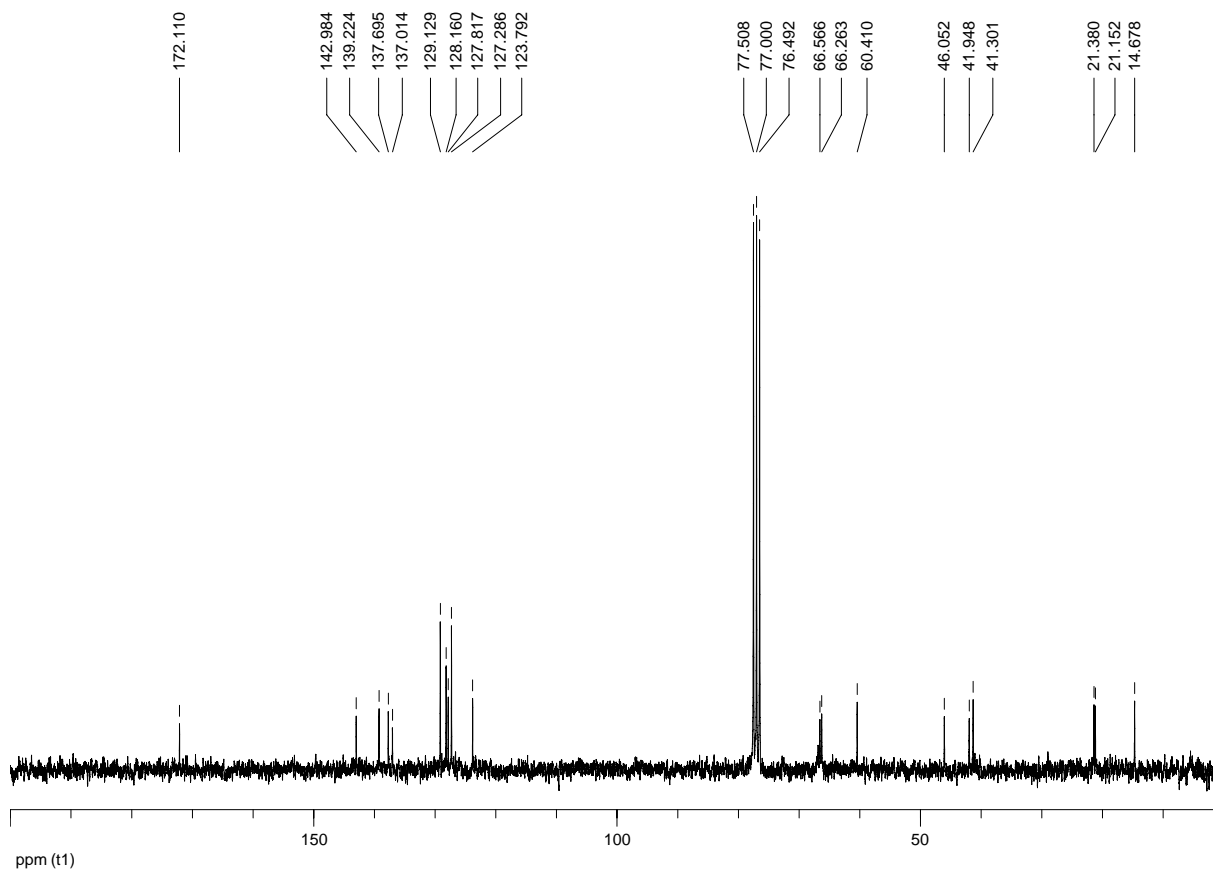

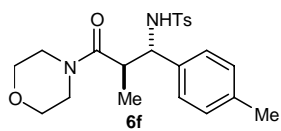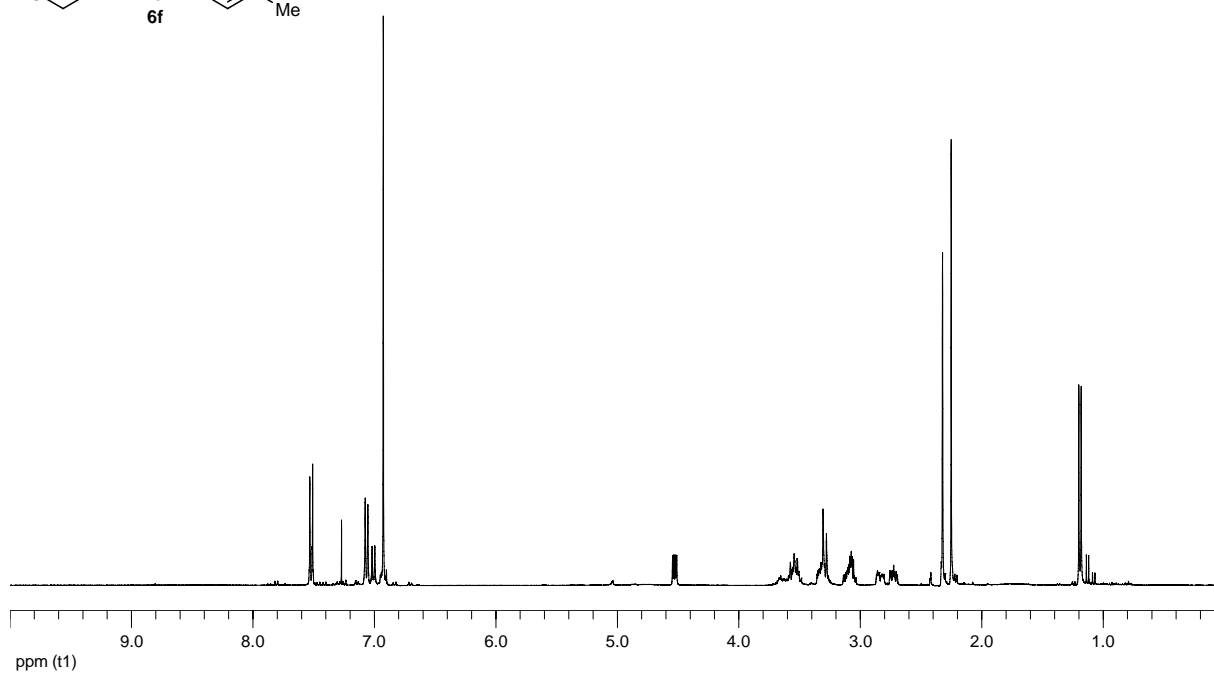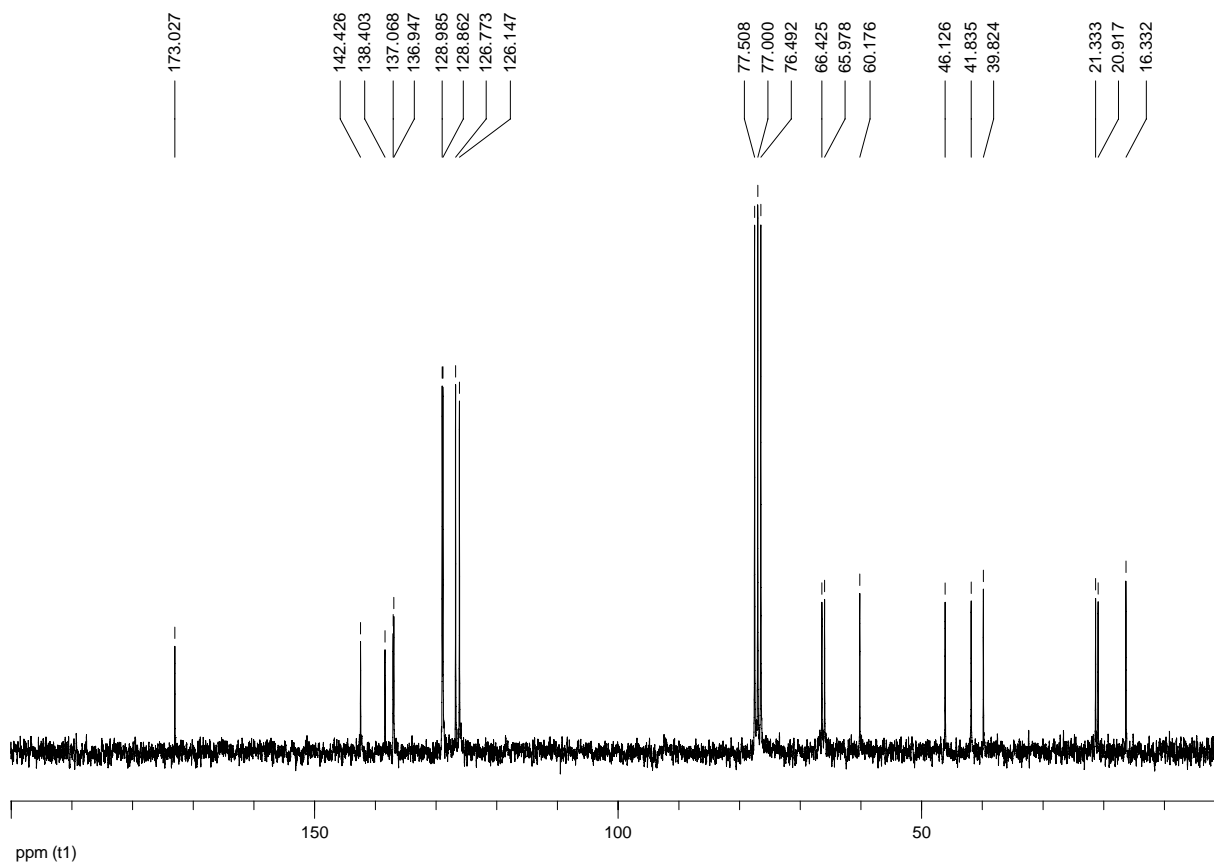

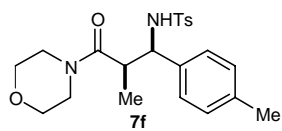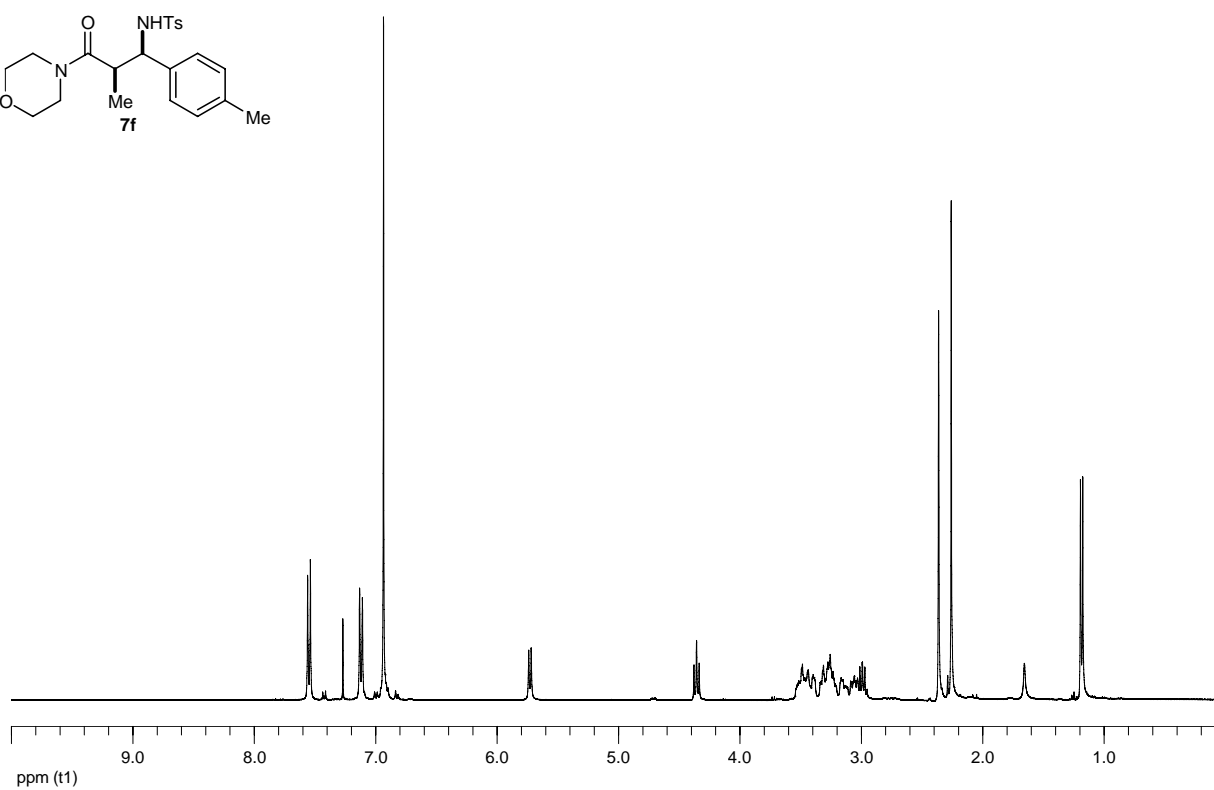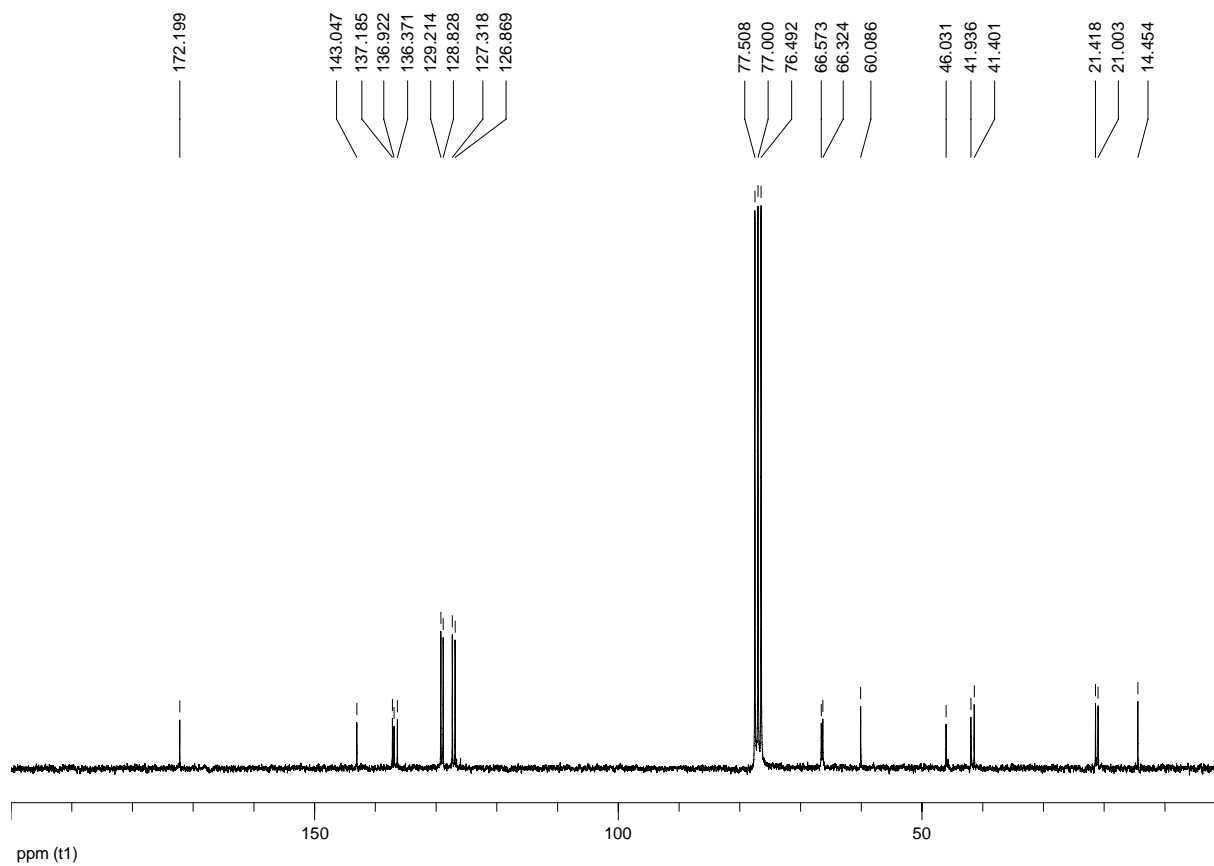

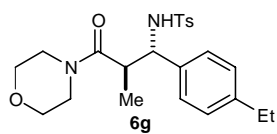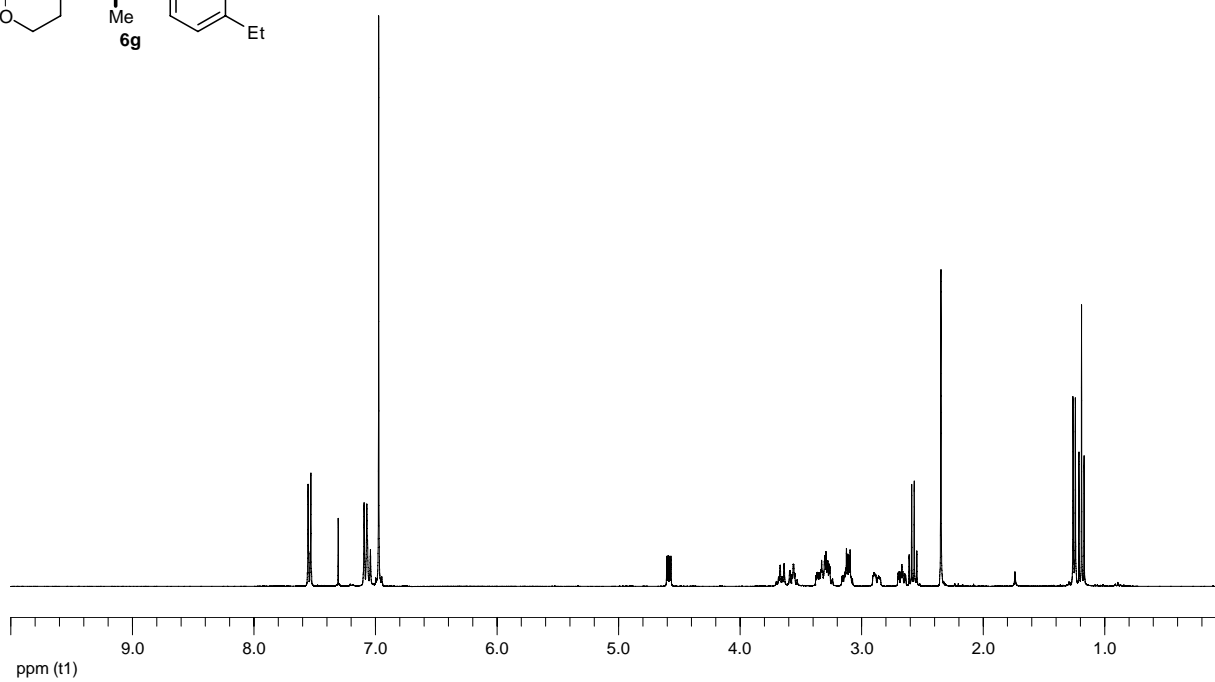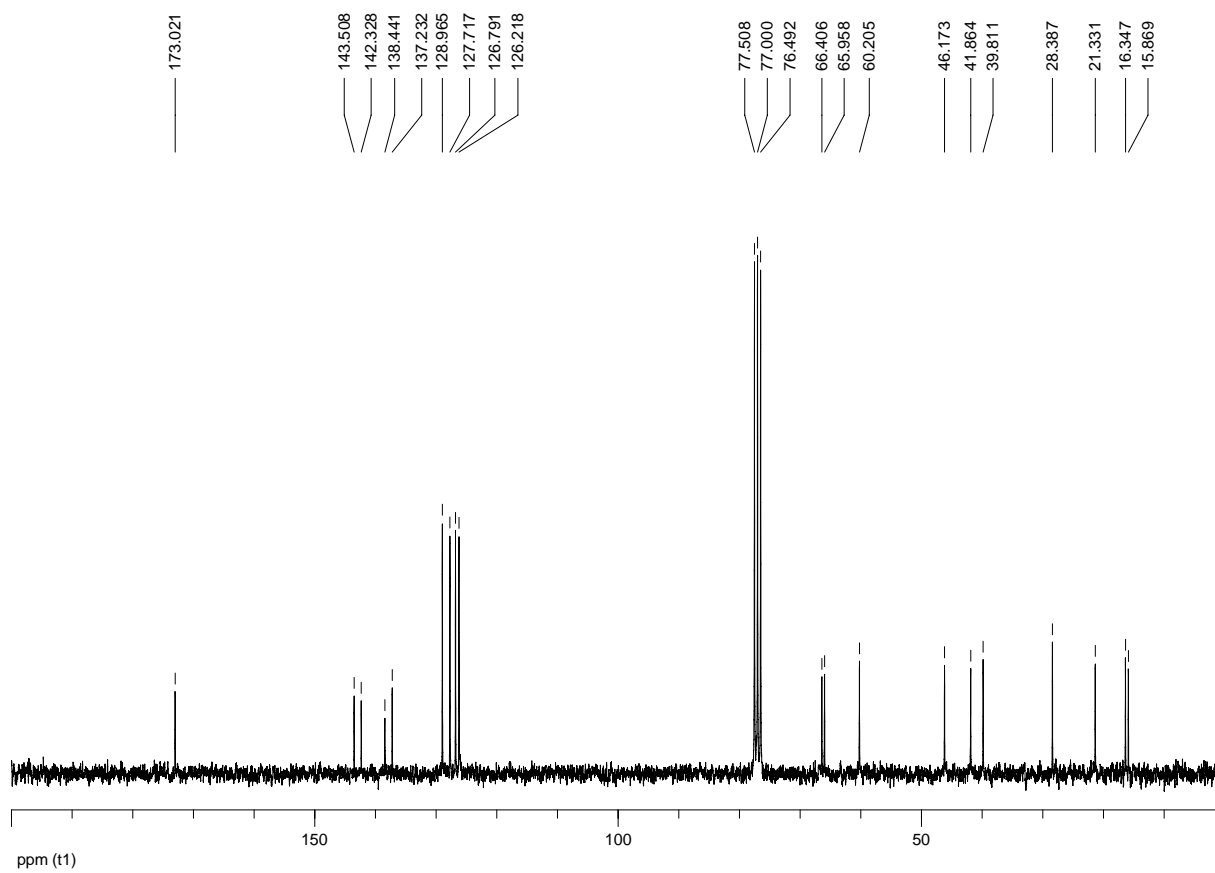

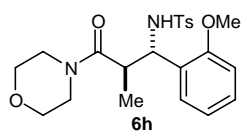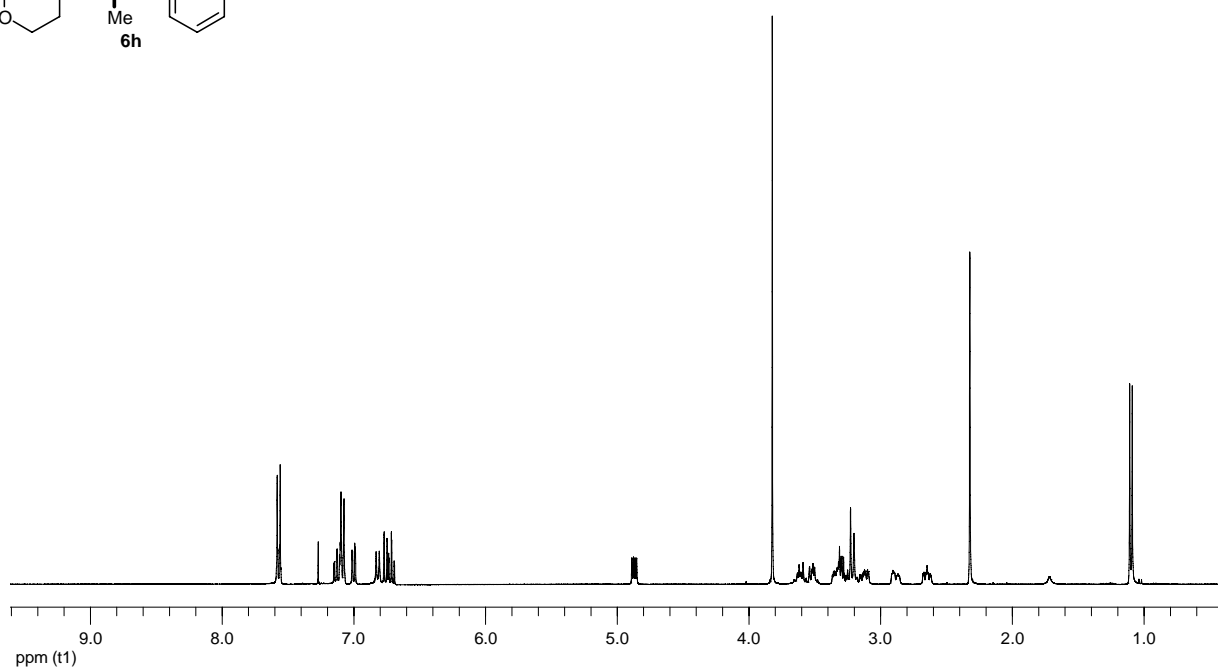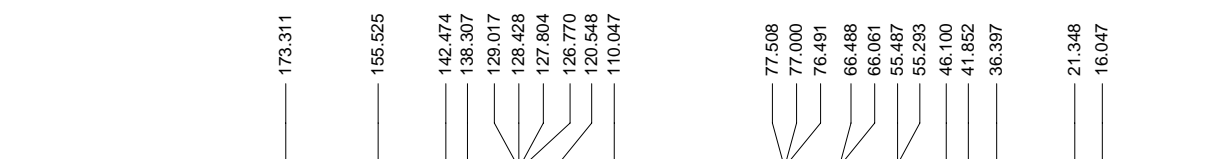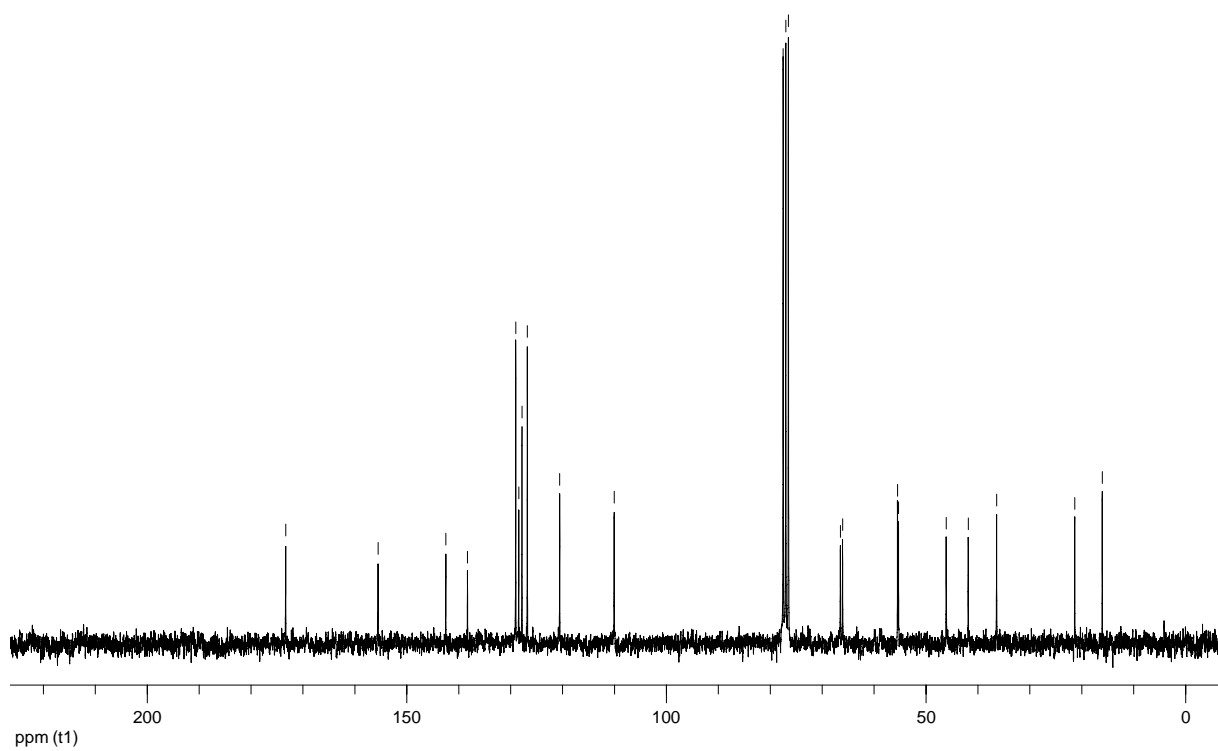

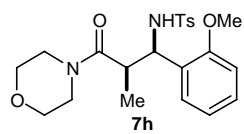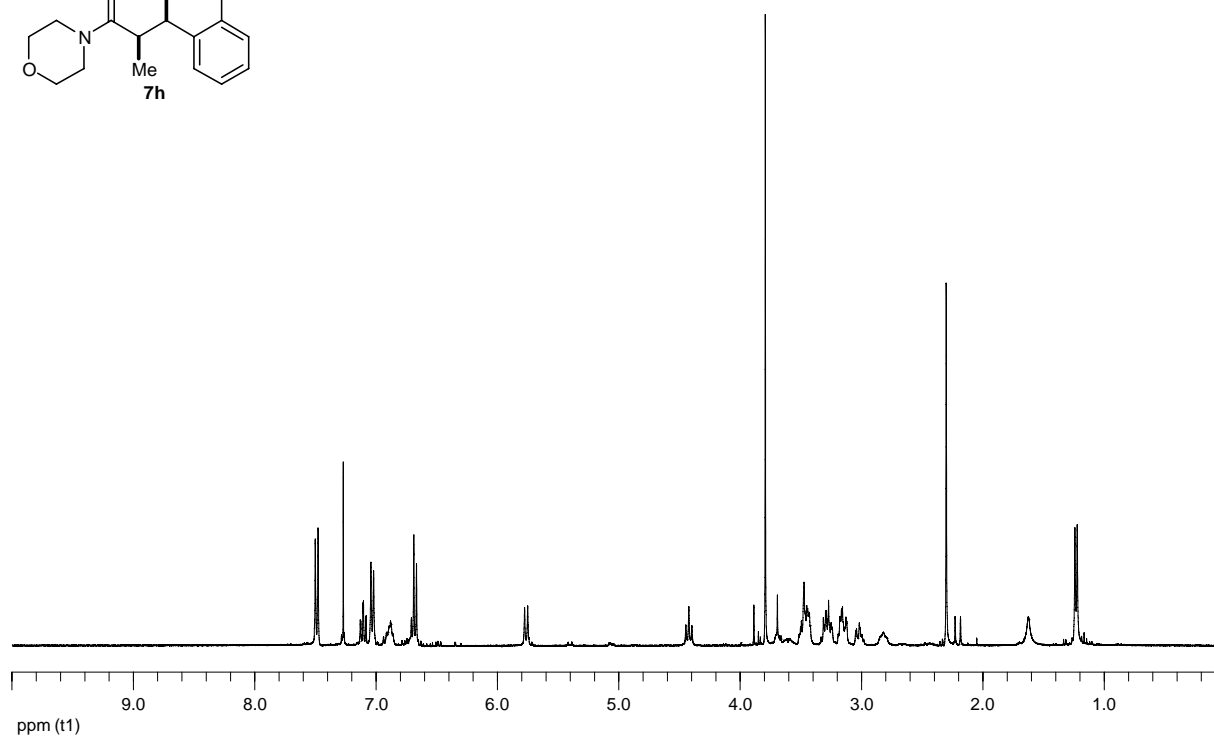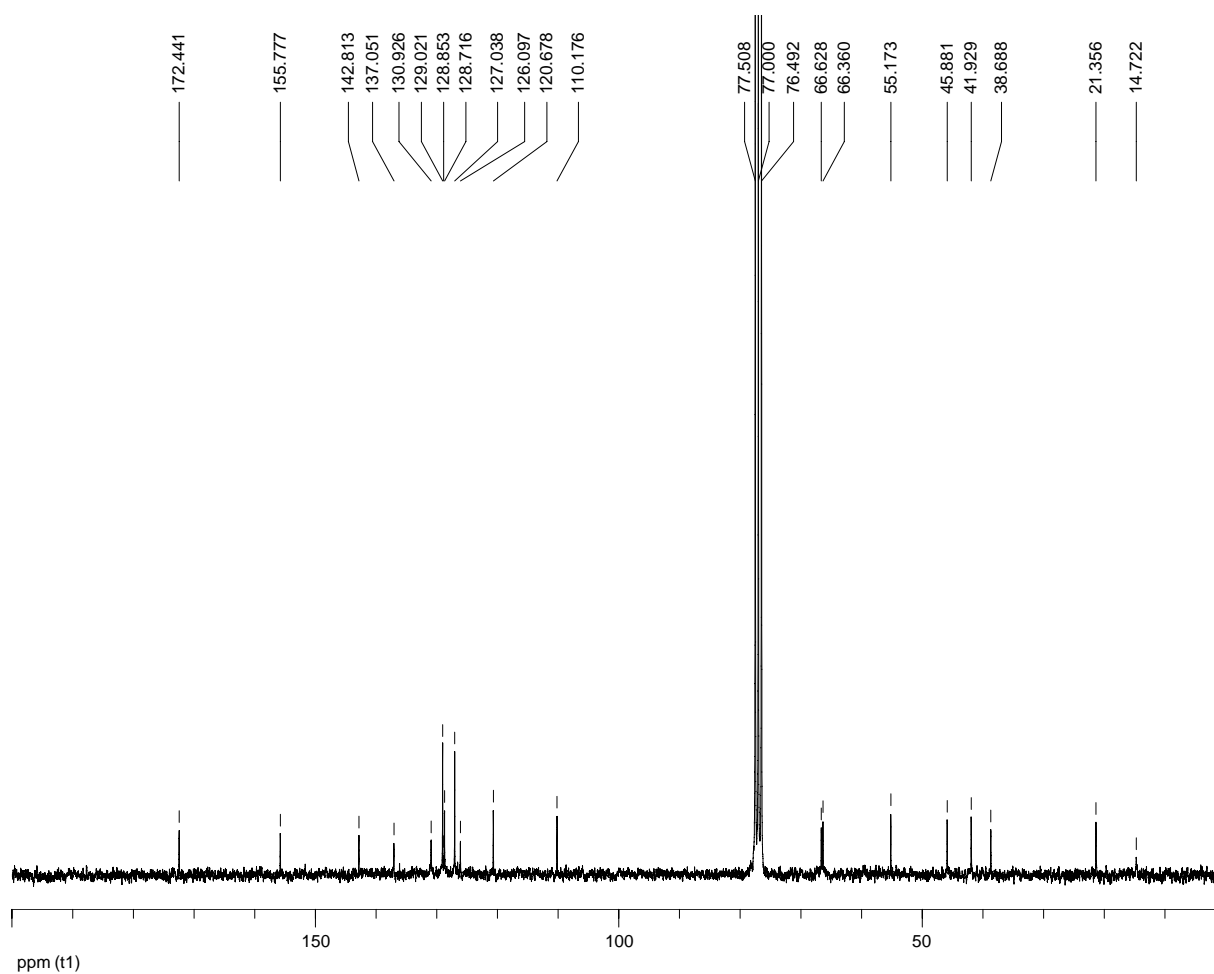

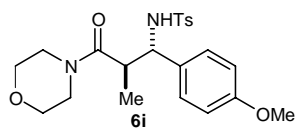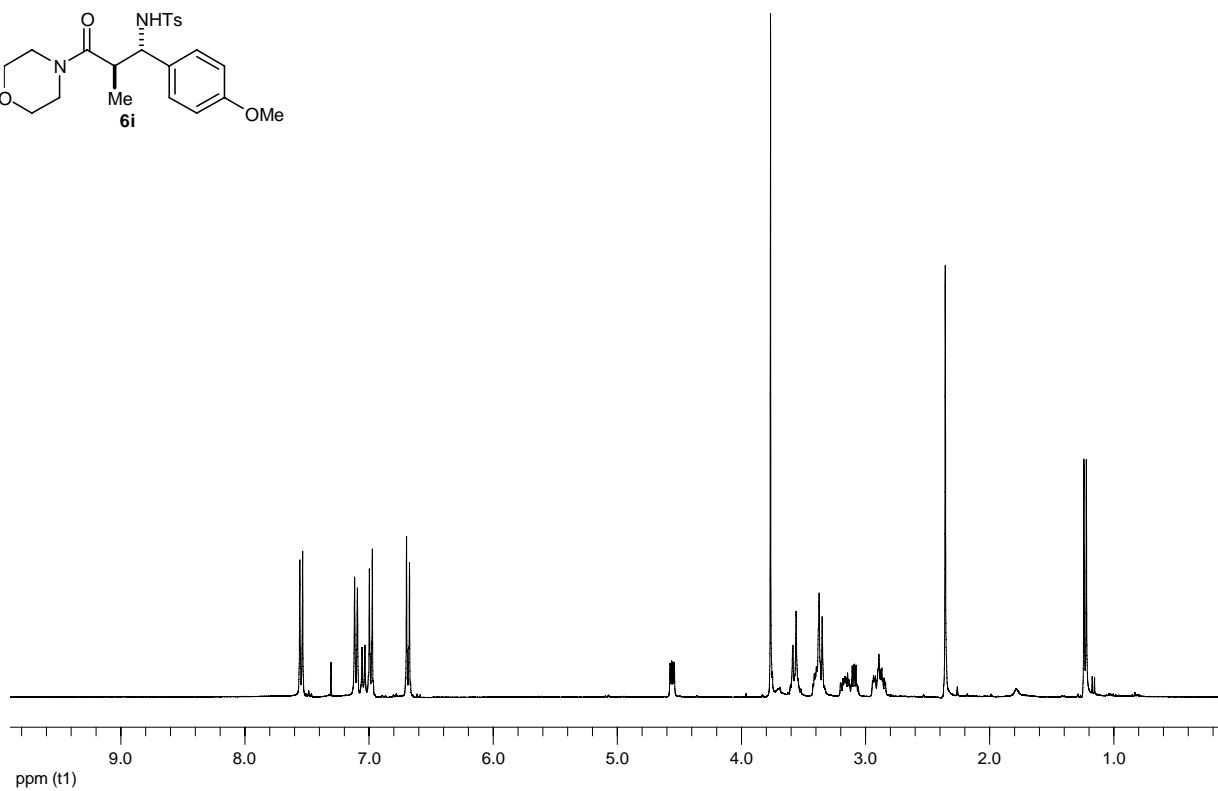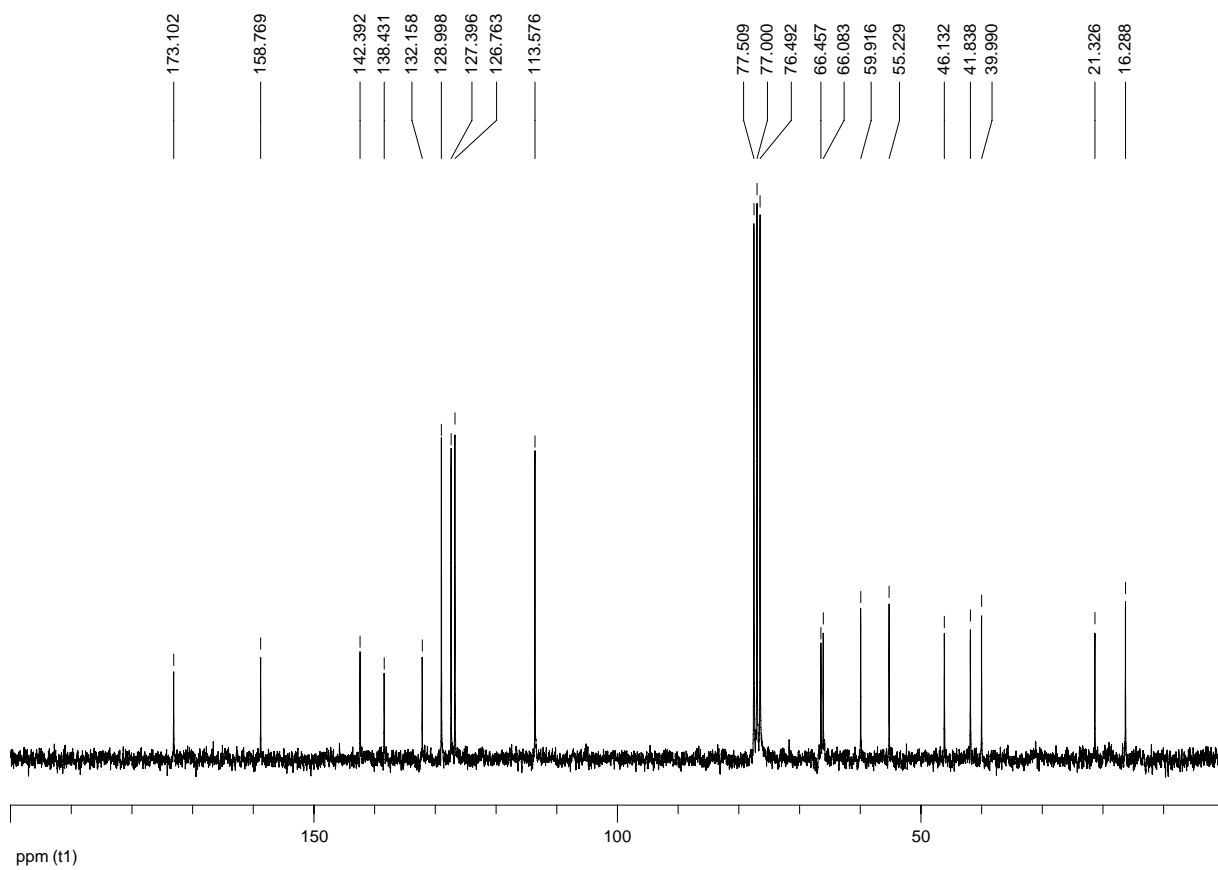



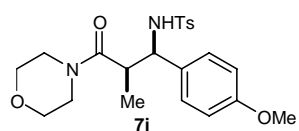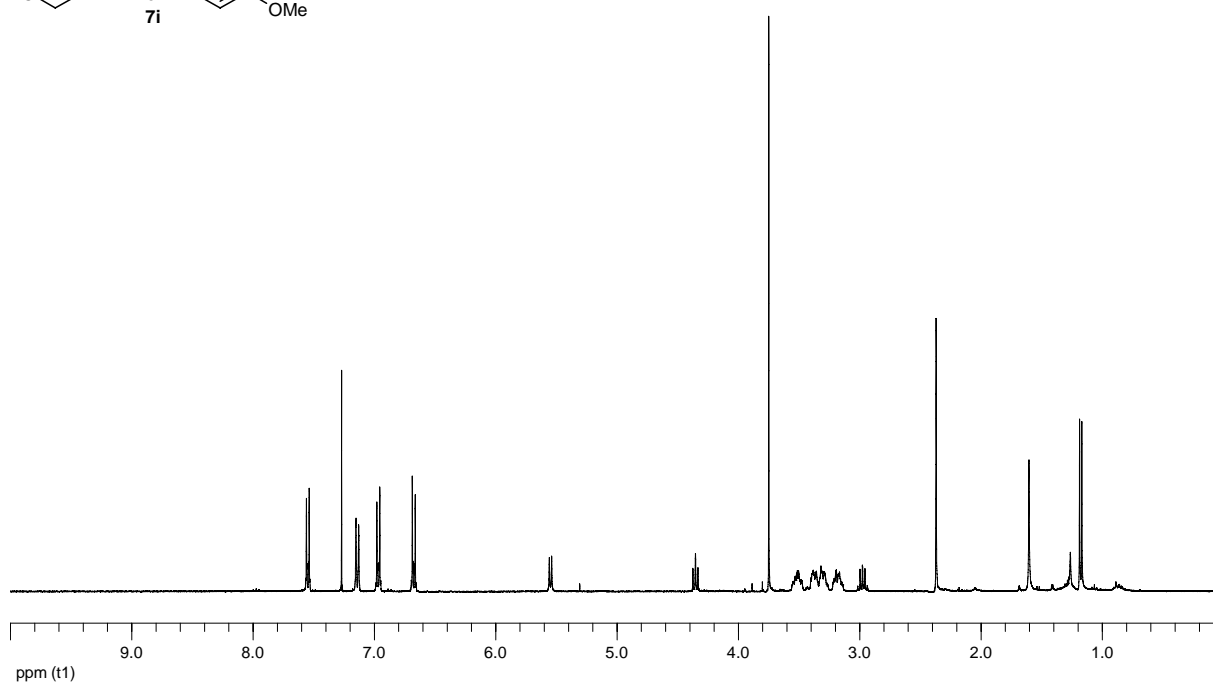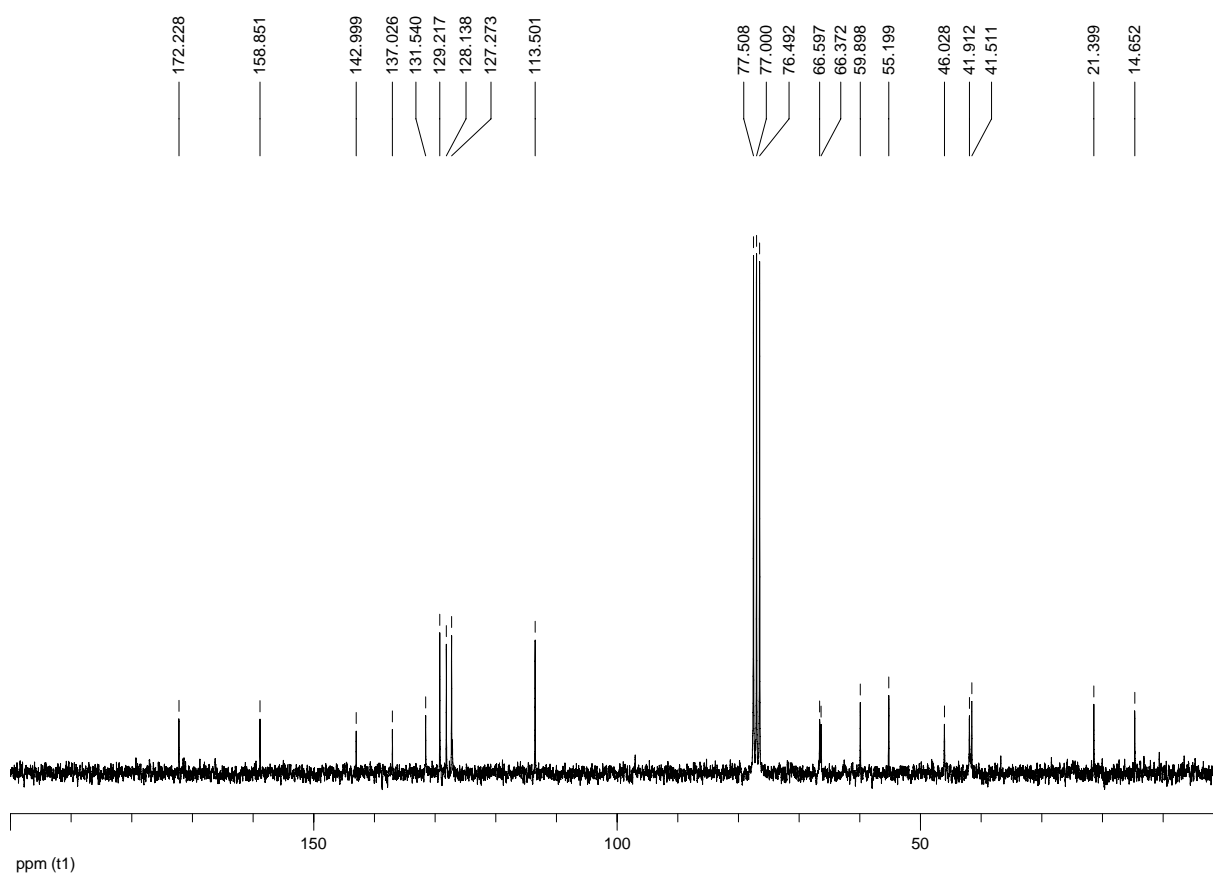

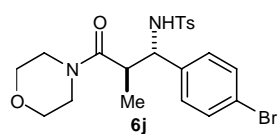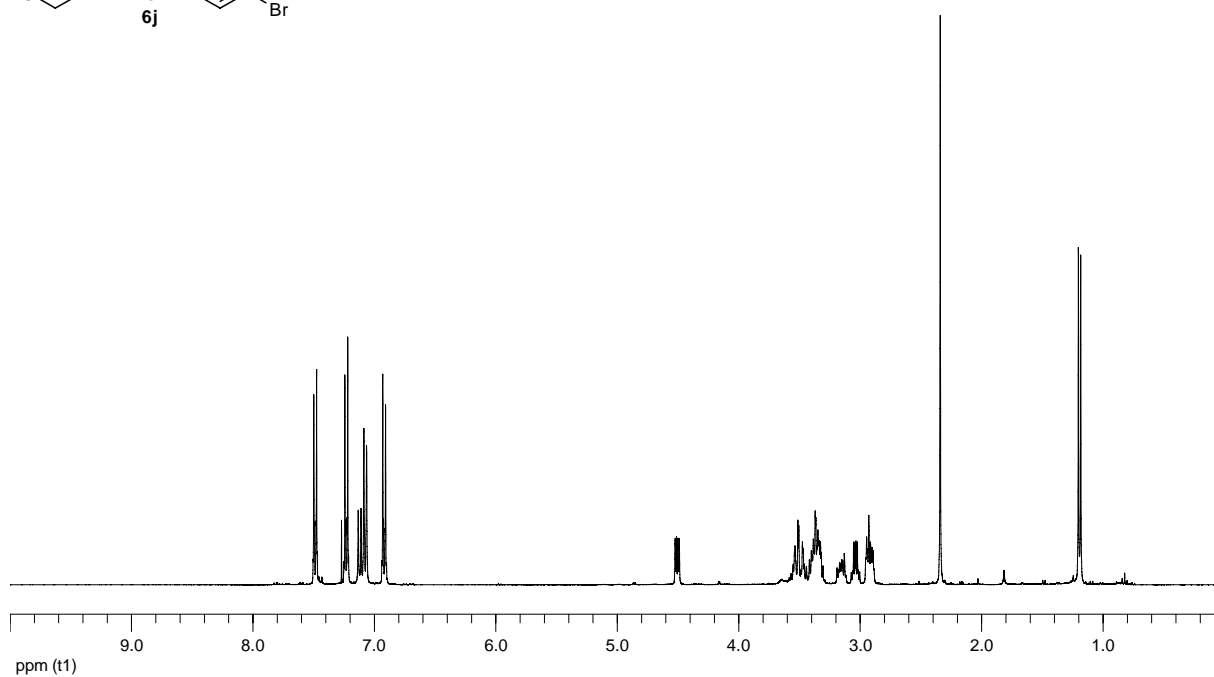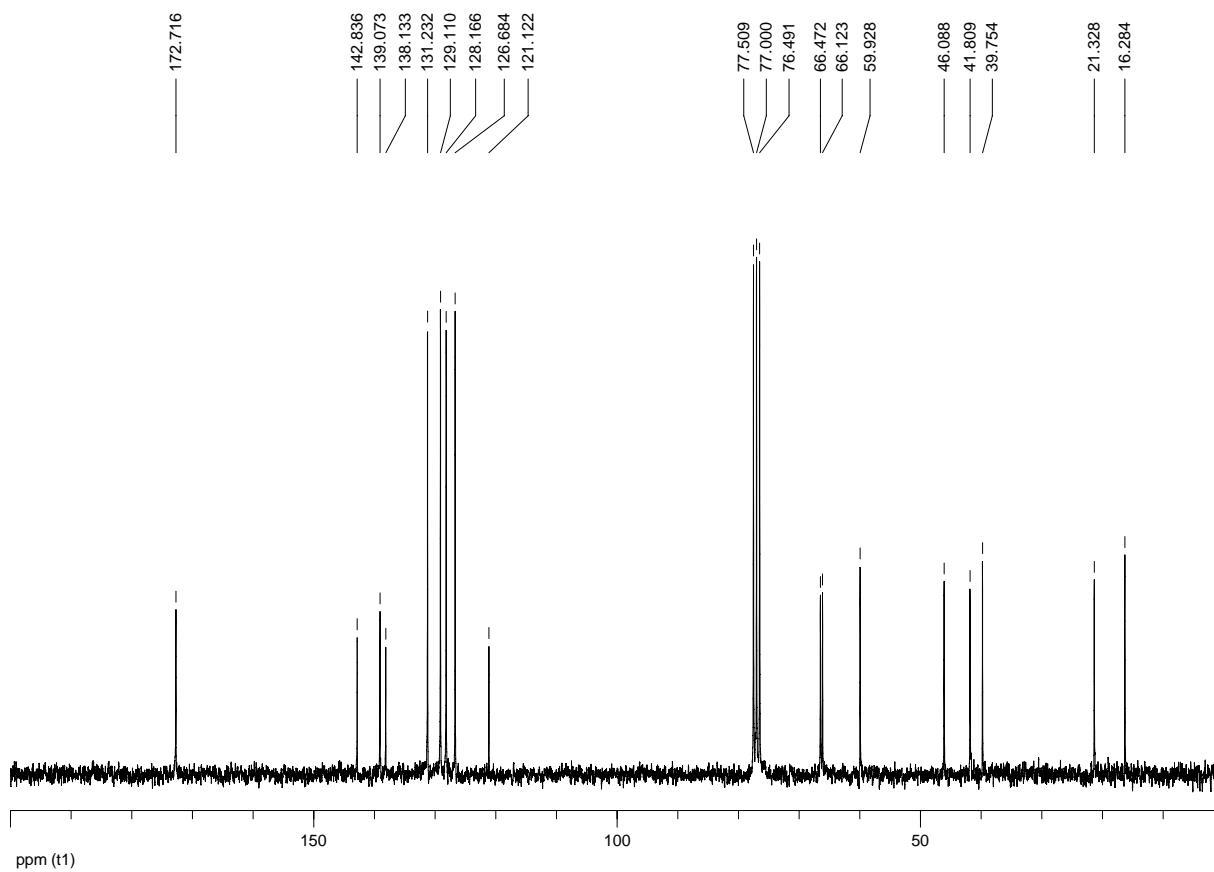

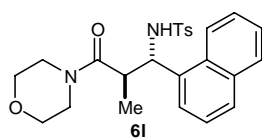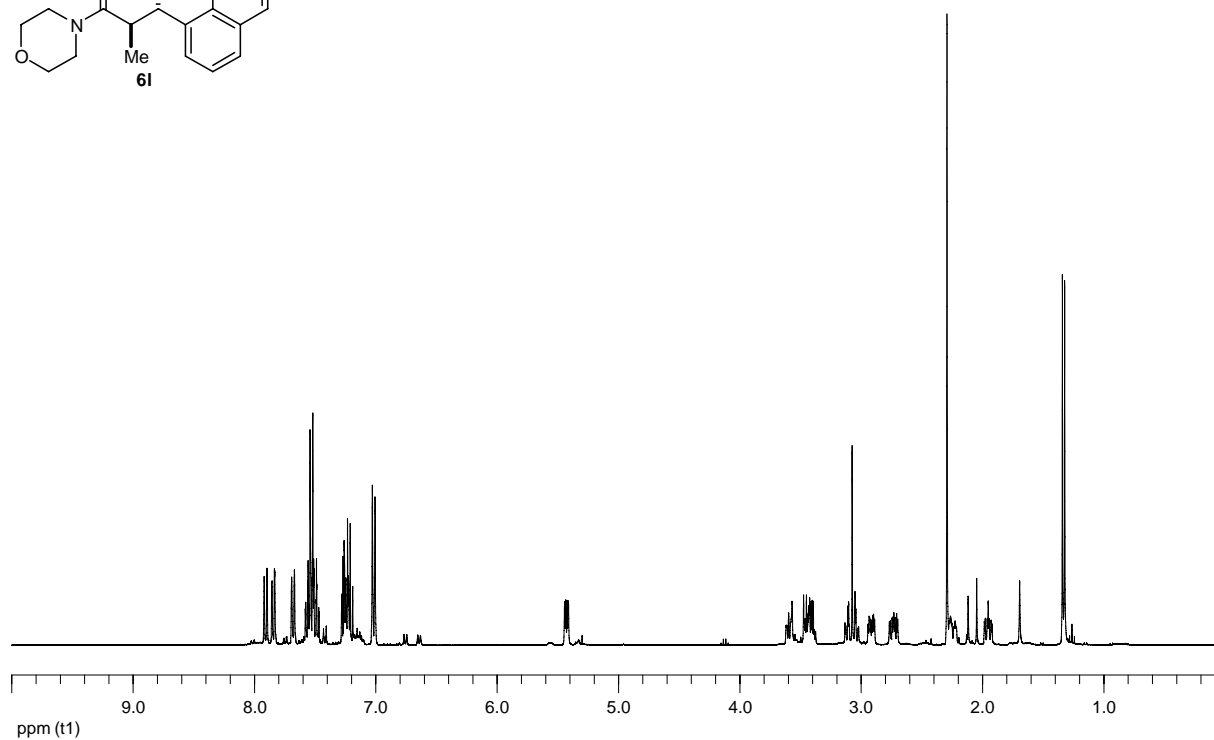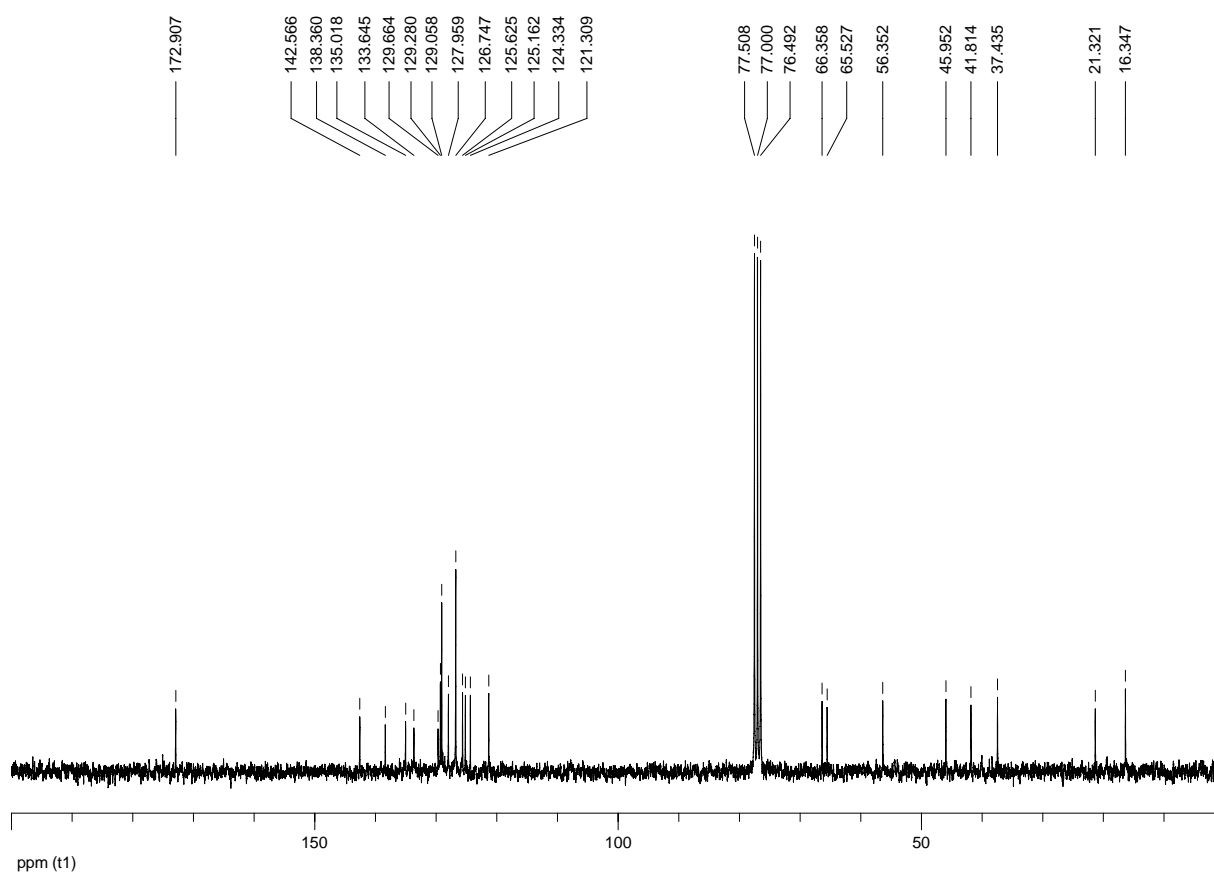

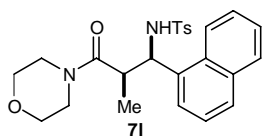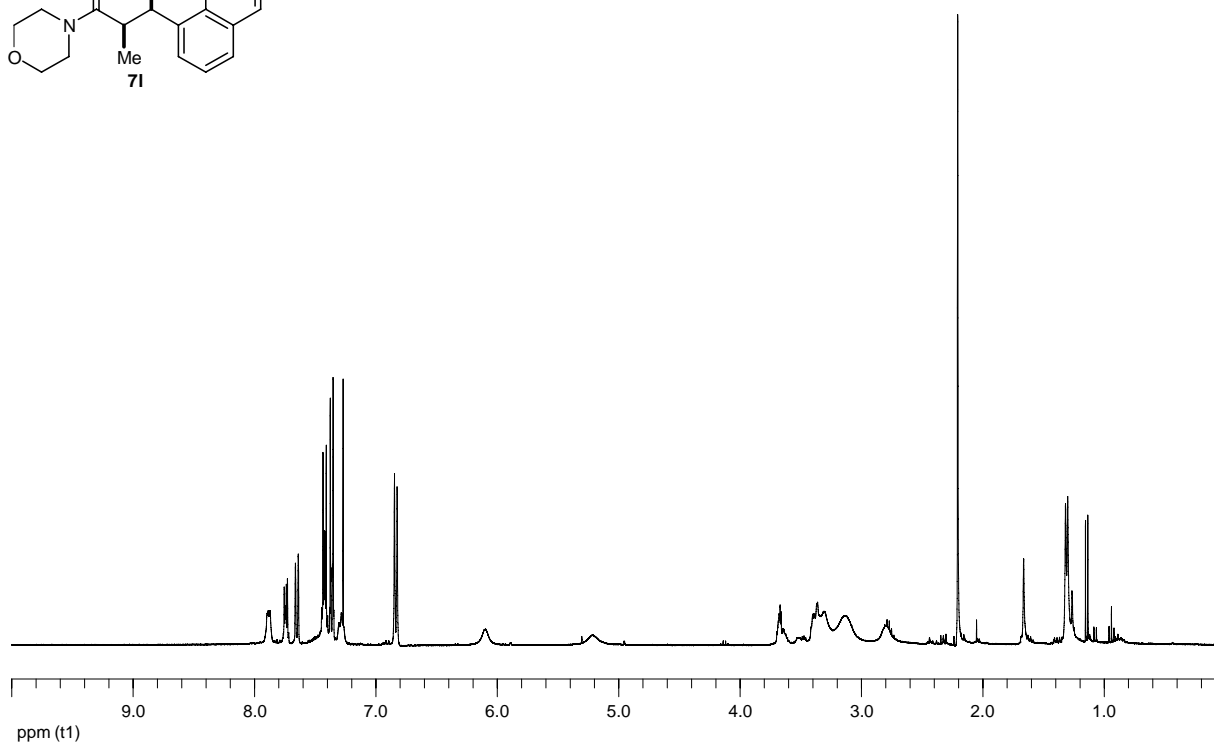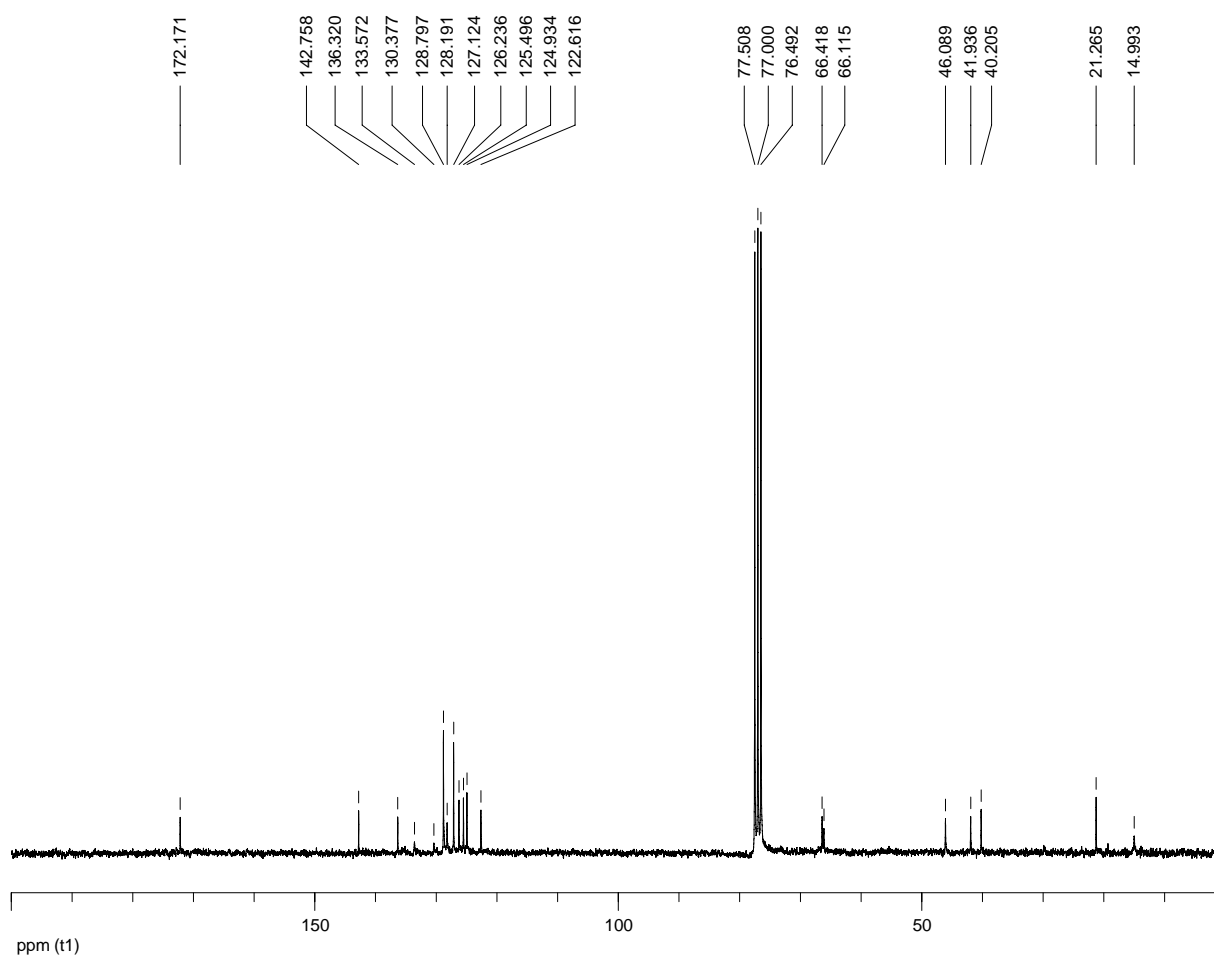

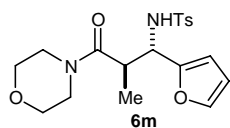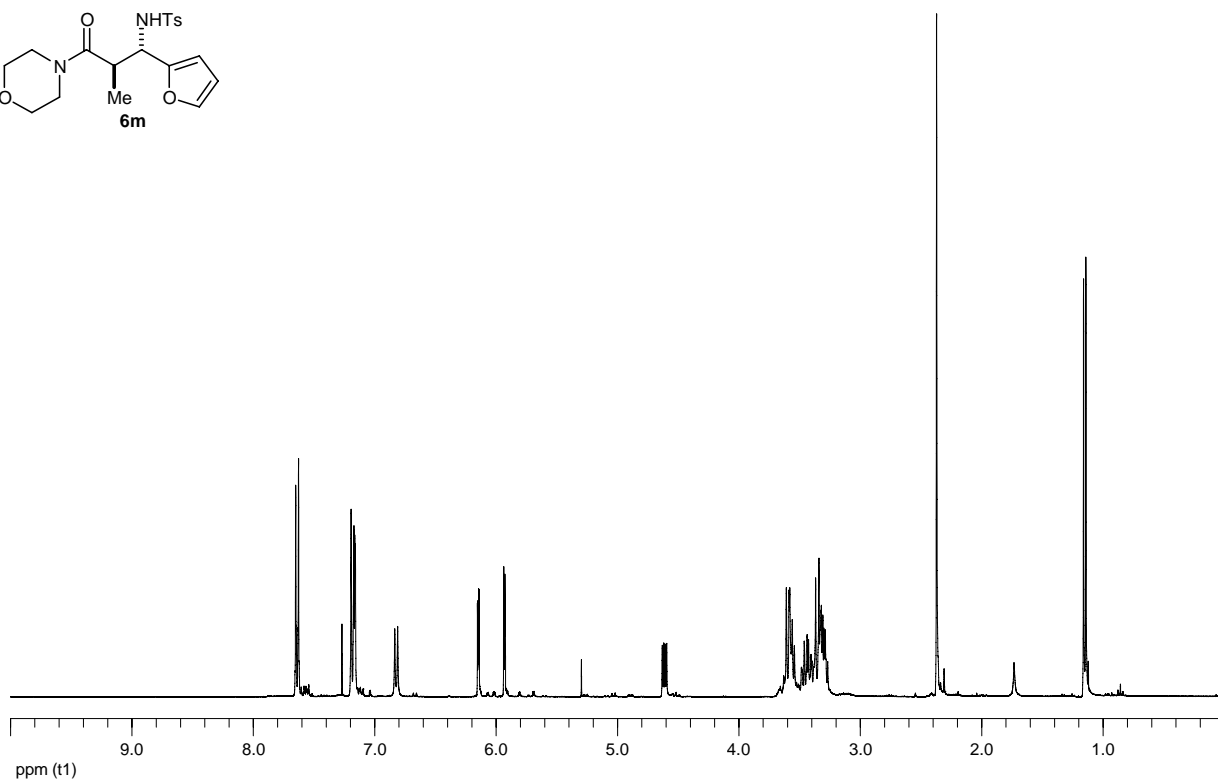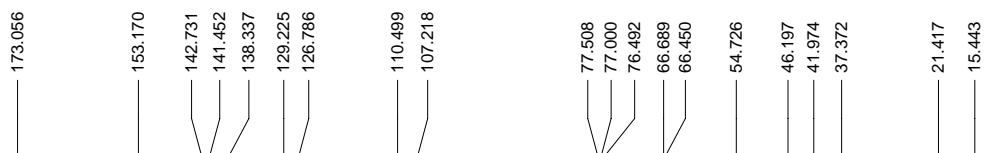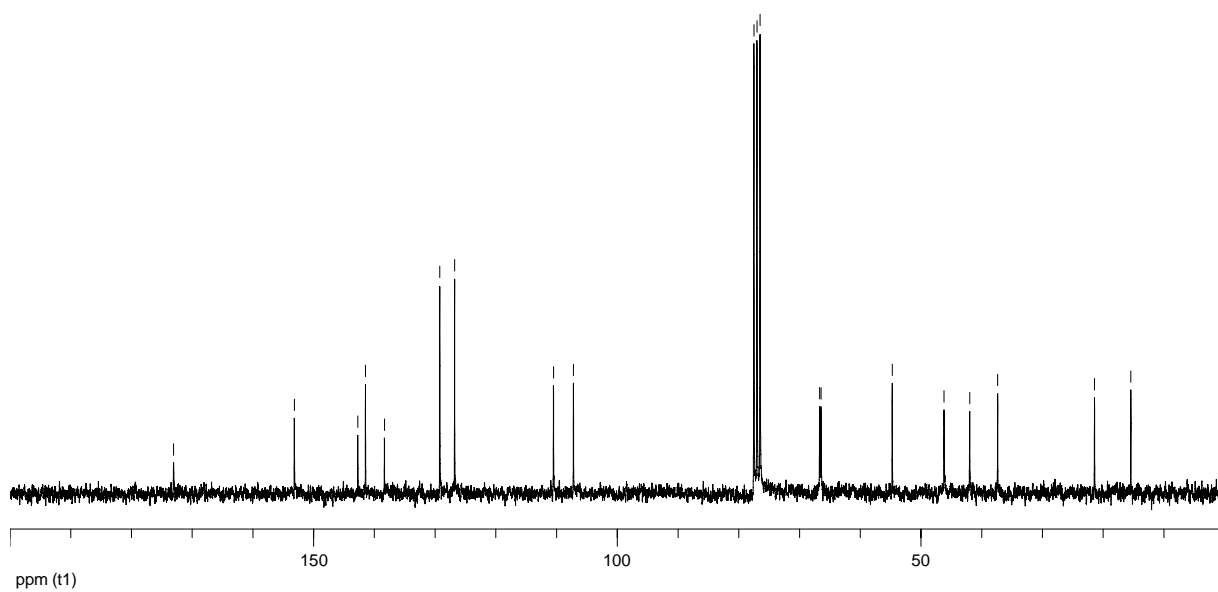

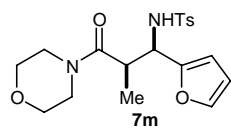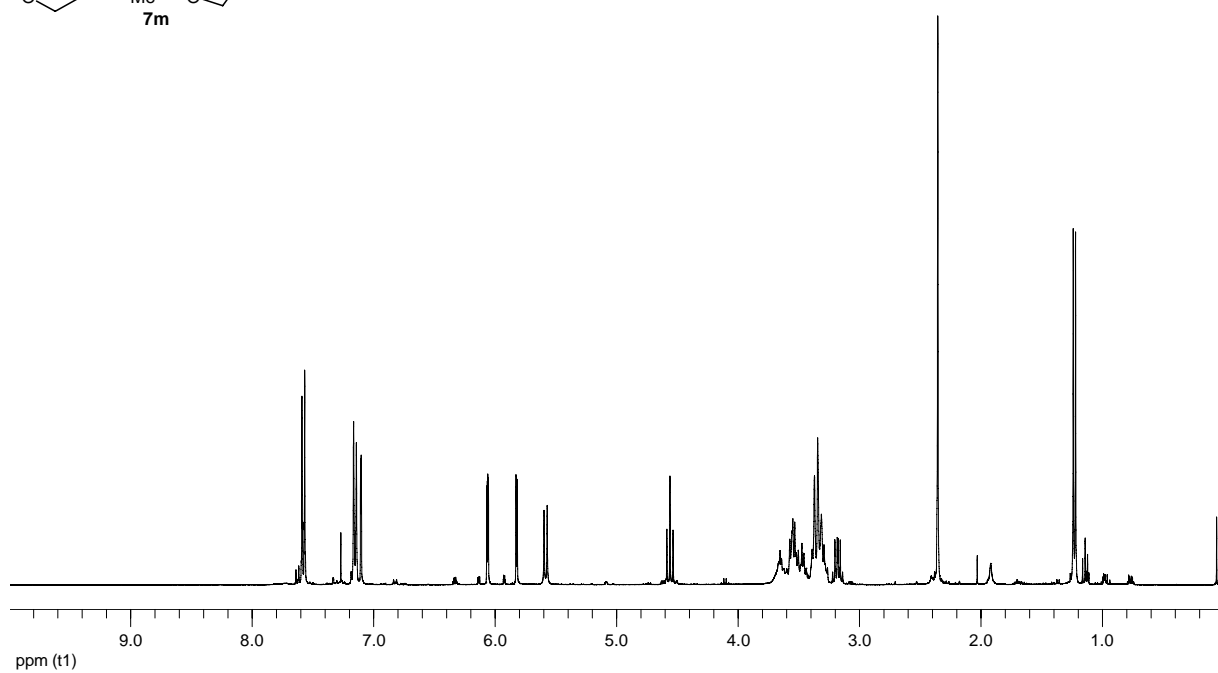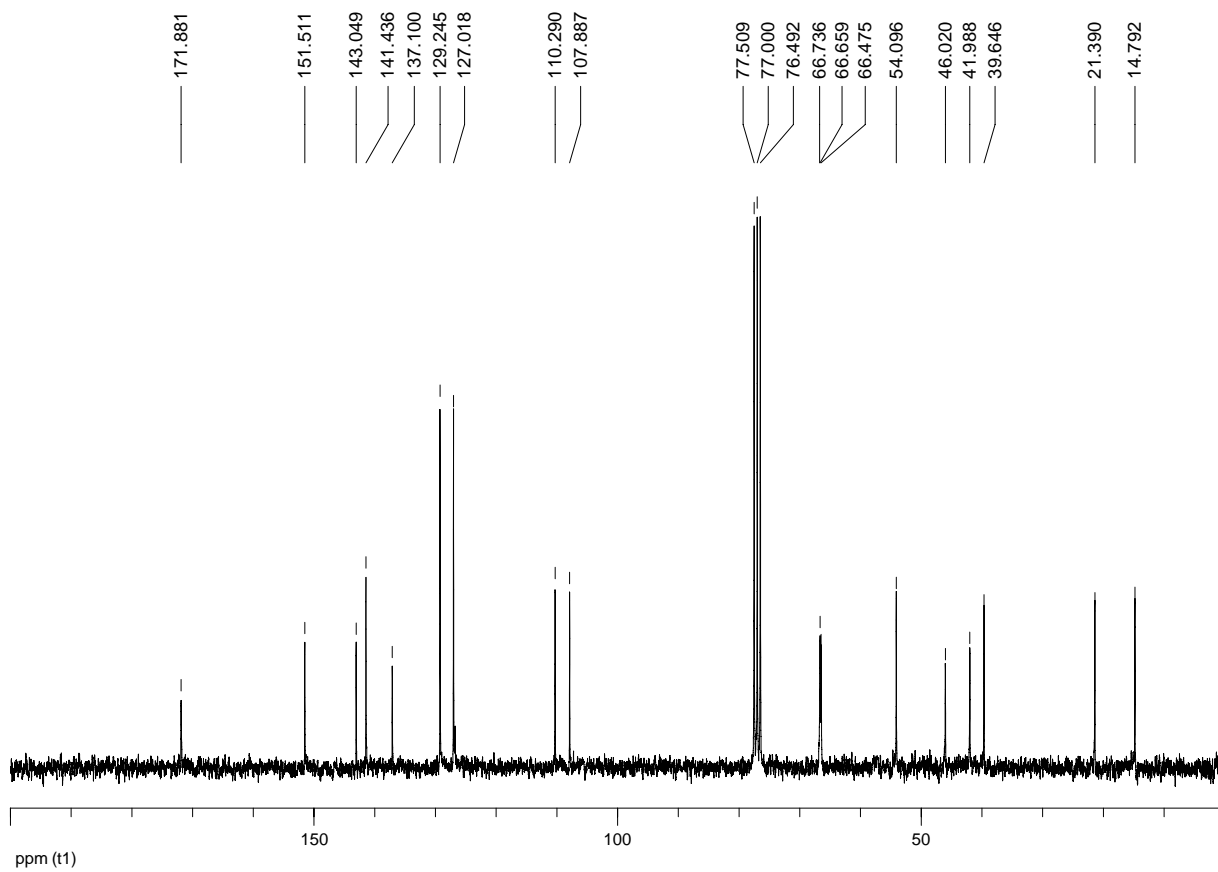

Supplement: b715839d.pdf [file b715839d.pdf]
